# Supplementary material for: Trends in Antidiabetic Drug Discovery: FDA Approved Drugs, New Drugs in Clinical Trials and Global Sales
Source: Front Pharmacol. 2022 Jan 19;12:807548. doi: 10.3389/fphar.2021.807548 (PMC8807560; doi:10.3389/fphar.2021.807548)
Supplement: Supplementary file 2 [file Table1.XLSX]

## Sheet: Agents in ClinicalTrials
CT name	Name synonyms	Drug Name	Repurposed drug	Approved in other country	Combination/MultiTarget	Agent highest phase achieved	Drug Class	Novel targets	TARGET	Target Class	Target Class 2	Target Figure Notes	NOTE 1
ISIS 484137	ION-224; IONIS-DGAT2Rx; ISIS 484137; ISIS-DGAT2Rx	ISIS 484137				Phase 2	Antisense oligonucleotides	Novel targets	DGAT2	Diacylglycerol O-acyltransferase 2	Enzymes	Enzymes
ISIS-703802	ISIS-703802	ISIS 703802 salt; ISIS-703802; Vupanorsen sodium				Phase 2	Antisense oligonucleotides	Novel targets	ANGPTL3	Angiopoietin-related protein 3	Other	Other
ISIS-GCCRRx	ISIS-GCCRRx	ISIS-GCCRRX				Phase 2	Antisense oligonucleotides	Novel targets	NR3C1	Glucocorticoid receptor	Receptors	Receptors: GR
BI-456906	BI 456906	BI-456906			Multi-target	Phase 2	Biologicals	Novel combination	GLP1R, GCGR	Glucagon like peptide 1 receptor, Glucagon receptor	Receptors	GLP1R, GCGR
Rituximab; Abatacept	Rituximab; Abatacept	Rituximab,Abatacept	Repurposed drug		Sequential combination	Phase 2	Biologicals	Novel targets	CD20, CD80 and CD86 receptors	Immunomodulators	Immunomodulation	Immunomodulation
Mifepristone	Mifepristone	Mifepristone	Repurposed drug		Multi-target	Phase 2	Biologicals	Novel targets	NR3C1, PGR	Glucocorticoid, progesterone receptors	Receptors	Receptors: GR
Cabergoline	Cabergoline	Cabergoline	Repurposed drug			Phase 3	Biologicals		DRD2	Dopamine D2 receptor	Receptors	DRD2
NNC0472-0147; NN1147; Insulin 147	NNC0472-0147	NN1147				Phase 1	Biologicals		INSR	INSR	Receptors	Insulin receptor
NNC0480-0389; NN9389; Insulin 965	NNC0480-0389	NN9389				Phase 1	Biologicals		INSR	INSR	Receptors	Insulin receptor
Dasiglucagon	ZP 4207; ZP-GA-1	Dasiglucagon				Phase 3	Biologicals: peptide	Novel targets	GCGR	Glucagon receptor OS=Homo sapiens GN=GCGR PE=1 SV=1	Receptors	Receptors: GCGR
PB-119	PB-119	PB-119; PEG-exenatide				Phase 3	Biologicals: peptide		GLP1R	Glucagon-like Peptide 1 receptor OS=Homo sapiens GN=GLP1R PE=1 SV=1	Receptors	GLP1R
MEDI0382	MEDI0382	Cotadutide			Multi-target	Phase 2	Biologicals: Protein product	Novel combination	GLP1R, GCGR	Glucagon receptor OS=Homo sapiens GN=GCGR PE=1 SV=1	Receptors	GLP1R, GCGR
JNJ-64565111	HM12525A; JNJ 5111; JNJ-64565111	Efinopegdutide				Phase 2	Biologicals: Protein product	Novel combination	GLP1R, GCGR	Glucagon receptor OS=Homo sapiens GN=GCGR PE=1 SV=1	Receptors	GLP1R, GCGR
Tirzepatide	LY3298176	Tirzepatide				Phase 3	Biologicals: Protein product	Novel targets	GPR119	Glucose-dependent insulinotropic receptor (G-Protein coupled receptor 119)	Receptors	Receptors: GPR119
JY 09	JY 09	JY09				Phase 1	Biologicals: Protein product		GLP1R	Glucagon like peptide 1 receptor	Receptors	GLP1R
Efpeglenatide	efpeglenatide; HM11260C	Efpeglenatide			Multi-target	Phase 3	Biologicals: Protein product		GLP1R	Glucagon like peptide 1 receptor	Receptors	GLP1R
LY3209590	LY3209590	Basal Insulin-FC				Phase 2	Biologicals: Protein product		INSR	INSR	Receptors	Insulin receptor
NN1406	NN1406	NNC0143-0406; NNC0143-0406 A; PI 406				Phase 2	Biologicals: Protein product		INSR	INSR	Receptors	Insulin receptor
Insulin tregopil	GW 843362; Insulin tregopil; Hexyl Insulin M2; Hexyl insulin monoconjugate 2; HIM2; IN-105; NIN-058; Oral prandial insulin	Insulin tregopil				Phase 3	Biologicals: Protein product		INSR	INSR	Receptors	Insulin receptor
RG 7992	RG 7992	BFKB 8488A; RO 7040551			Multi-target	Phase 1	Bispecific antibodies	Novel targets	KLB, FGFR1	Beta-klotho, FGFR1	Other	Other
LY3437943	LY3437943 (GLP1 + GIP + Glucagon); Triple G; GGG	LY3437943			Multi-target	Phase 1	Large molecule - probably biological	Novel combination	GLP1R; GIPR; GCGR	Glucagon-like Peptide 1 receptor OS=Homo sapiens GN=GLP1R PE=1 SV=1	Receptors	GLP1R; GIPR; GCGR
LY3493269	LY3493269 (GLP1 + GIP)	LY3493269			Multi-target	Phase 1	Large molecule - probably biological - Peptide	Novel combination	GLP1R; GIPR	Glucagon-like Peptide 1 receptor OS=Homo sapiens GN=GLP1R PE=1 SV=1	Receptors	GLP1R; GIPR
REMD-477	REMD-477	Volagidemab				Phase 2	Monoclonal antibody	Novel targets	GCGR	Glucagon receptor OS=Homo sapiens GN=GCGR PE=1 SV=1	Receptors	Receptors: GCGR
PAZ320	BTI320	PAZ320				Phase 2	Polysaccharide		GAA	Lysosomal alpha-glucosidase OS=Homo sapiens GN=GAA PE=1 SV=2	Enzymes	Alpha- glucosidase
LY3305677	LY3305677	LY3305677			Multi-target	Phase 1	Protein product	Novel combination	GLP1R, GCGR	Glucagon-like Peptide 1 receptor OS=Homo sapiens GN=GLP1R PE=1 SV=1	Receptors	GLP1R, GCGR
LY2944876	LY2944876; OPK 88003; Oxyntomodulin analog - Eli Lilly and Company; TT-401	Pegapamodutide			Multi-target	Phase 2	Protein product	Novel combination	GLP1R, GCGR	Glucagon-like Peptide 1 receptor OS=Homo sapiens GN=GLP1R PE=1 SV=1	Receptors	GLP1R, GCGR
DM-199	DM-199	DM-99				Phase 1/2	Protein product	Novel targets	KLK1	Human tissue kallikrein 1 supplementation	Other	Other
Substance P	Substance P	Substance P	Repurposed drug			Phase 1	Protein product	Novel targets	TACR1	Substance P receptor (NK-1R)	Receptors	Receptors
GABA and GAD supplementation	GABA and GAD supplementation	GABA and GAD supplementation				Phase 1	Protein product	Novel targets	GABARa, GABARb	GABA receptors	Receptors	Receptors: GABA
KBP-089	KBP-089	DACRA-089				Phase 1	Protein product		CALCR, RAMP1	Receptor activity-modifying protein 1	Receptors	Amylin receptors
Beinaglutide	Beinaglutide; benaglutide	Benaglutide		Approved in China 2016			Protein product		GLP1R	Glucagon-like Peptide 1 receptor OS=Homo sapiens GN=GLP1R PE=1 SV=1	Receptors	GLP1R	10.1002/osp4.342
HTI2088	HS 20004; HTI-2088	Noiigliutide				Phase 2	Protein product		GLP1R	Glucagon-like Peptide 1 receptor OS=Homo sapiens GN=GLP1R PE=1 SV=1	Receptors	GLP1R
HM12470	HM12470	HM12470				Phase 1	Protein product		INSR	INSR	Receptors	Insulin receptor
HM12460A	HM12460A; HM 12460B; Insulin long-acting	HM12460A				Phase 1	Protein product		INSR	INSR	Receptors	Insulin receptor
Supaglutide	Supaglutide	Supaglutide				Phase 2	Recombinant fusion protein		GLP1R	Glucagon like peptide 1 receptor agonist	Receptors	GLP1R
GX-G6	GX-G6	TG-103; TJ 103.				Phase 2	Recombinant fusion protein		GLP1R	Glucagon like peptide 1 receptor agonist	Receptors	GLP1R
XW003	XW003	XW003				Phase 1	Recombinant protein		GLP1R	Glucagon like peptide 1 receptor agonist	Receptors	GLP1R
Insulin icodec	Insulin-287; LAI-287; Long-acting basal insulin analogue; Long-acting-insulin-287; NN-1436; NN-1956; NNC-0148-0000-0287; NNC0148-0287 C; OI-287GT	Insulin icodec				Phase 3	Recombinant protein		INSR	INSR	Receptors	Insulin receptor
ISIS-PTP1BRx	ISIS-PTP1BRx	ISIS-PTP1BRX				Phase 2	Antisense oligonucleotide; siRNA	Novel targets	PTPN1	Tyrosine-protein phosphatase non-receptor type 1 OS=Homo sapiens GN=PTPN1 PE=1 SV=1	Enzymes	Enzymes
BAY81-9783	BAY81-9783; Glucobay-M; Metformin/acarbose	Acarbose/metformin			Combination	Phase 1	Small Molecule	Novel combination	GAA	Biguanide; Alpha- glucosidase	Enzymes	Biguanide; Alpha- glucosidase inhibitor
PF-06835919	PF-06835919	PF-06835919				Phase 2	Small Molecule	Novel targets	KHK	Ketohexokinase	Enzyme	Kinase
Donepezil	Donepezil	Donepezil	Repurposed drug			Phase 2	Small Molecule	Novel targets	ACHE	Acetycholinesterase	Enzymes	Enzymes
GSK2256294	GSK2256294	GSK2256294				Phase 2	Small Molecule	Novel targets	EPHX2	Epoxide hydrolase (soluble - cytoplasmic)	Enzymes	Enzymes
MB07803	MB07803	VK 0612	OLDER - but still in pipeline			Phase 2	Small Molecule	Novel targets	FBP1; FBP2	Fructose-1,6-bisphosphatase isozyme 2	Enzymes	Enzymes
ZGN-1061	ZGN-1061	Aclimostat				Phase 2	Small Molecule	Novel targets	METAP2	Methionine aminopeptidase 2	Enzymes	Enzymes
MLR-1023	MLR-1023; CP-26154	TOLIMIDONE				Phase 2	Small Molecule	Novel targets	LYN	Tyrosine-protein kinase Lyn	Enzymes	Kinase
PBI-4050	PBI-4050	Setogepram				Phase 2	Small Molecule	Novel targets	AMPK	5'-AMP-activated protein kinase catalytic subunit alpha-2	Enzymes	Kinase: AMPK
PXL770	PXL770	PXL770				Phase 2	Small Molecule	Novel targets	AMPK	5'-AMP-activated protein kinase catalytic subunit beta-1	Enzymes	Kinase: AMPK
HMS-5552	HMS-5552; RO-5305552; Sinogliatin	Dorzagliatin controlled release				Phase 3	Small Molecule	Novel targets	GCK	Glucokinase (EC 2.7.1.2) (Hexokinase type IV) (HK IV) (Hexokinase-4) (HK4) (Hexokinase-D)	Enzymes	Kinase: GCK
GK1-399	GK1-399; TTP399	GK1-399				Phase 2	Small Molecule	Novel targets	GCK	Glucokinase (EC 2.7.1.2) (Hexokinase type IV) (HK IV) (Hexokinase-4) (HK4) (Hexokinase-D)	Enzymes	Kinase: GCK
SY-004	Globalagliatin hydrochloride; Glubalagliatin	SY-004				Phase 2	Small Molecule	Novel targets	GCK	Glucokinase (EC 2.7.1.2) (Hexokinase type IV) (HK IV) (Hexokinase-4) (HK4) (Hexokinase-D)	Enzymes	Kinase: GCK
Anakinra	Anakinra	Anakinra	Repurposed drug			Phase 2	Small Molecule	Novel targets	IL1R	IL1R	Immunomodulation	Immunomodulation
Ranolazine	Ranolazine	Ranolazine	Repurposed drug - 4 trials show works in diabetes. Not sure if going for fda approval			Phase 3	Small Molecule	Novel targets	SCN1A	Sodium channel protein type 1 subunit alpha	Ion channel	Ion channel	4 trials show works in diabetes. Not sure if going for fda approval. Marketed for angina
XEN-D0501	XEN-D0501	BAY-69-9426; XEND0501				Phase 2	Small Molecule	Novel targets	TRPV1	Transient receptor potential cation channel subfamily V member 1	Ion channel	Ion channel	nTRPV1 receptor antagonists
CCX140	CCX140	CCX140				Phase 2	Small Molecule	Novel targets	CCR2	C-C chemokine receptor type 2 (C-C CKR-2) (CC-CKR-2) (CCR-2) (CCR2) (Monocyte chemoattractant Protein 1 receptor) (MCP-1-R) (CD antigen CD192)	Receptors	Receptors
GWP42004	GWP42004	TETRAHYDROCANNABIVARIN (THCV)				Phase 2	Small Molecule	Novel targets	CNR1	Cannabinoid receptor 1 OS=Homo sapiens GN=CNR1 PE=1 SV=1	Receptors	Receptors	Cannabinoid receptor CB1 antagonists; Cannabinoid receptor CB2 antagonists; Glucagon-like peptide 1 stimulants
TRC150094	T2-mimetic; TRC150094	TRC150094				Phase 3	Small Molecule	Novel targets	THRA	Thyroid hormone receptor	Receptors	Receptors	peptidomimetics
GABA;Alprazolam	GABA; Alprazolam	GABA, Alprazolam				Phase 1/2	Small Molecule	Novel targets	GABARa, GABARb	GABA receptors	Receptors	Receptors: GABA
LGD-6972	LGD-6972; RVT1502; MB11262	LGD-6972				Phase 2	Small Molecule	Novel targets	GCGR	Glucagon receptor OS=Homo sapiens GN=GCGR PE=1 SV=1	Receptors	Receptors: GCGR
DA-1241	DA-1241	DA-1241				Phase 1	Small Molecule	Novel targets	GPR119	Glucose-dependent insulinotropic receptor (G-Protein coupled receptor 119)	Receptors	Receptors: GPR119
MSDC-0602K	MSDC-0602K	MSDC-0602K				Phase 3	Small Molecule	Novel targets	MMTPM	Mitochondrial membrane transport protein modulators	Transporters	Transporters
KD026	KD026	KD026				Phase 2	Small Molecule	Novel targets	MTTP	Microsomal triglyceride transfer protein large subunit	Transporters	Transporters
DBPR108	DBPR108	DBPR108				Phase 3	Small Molecule		DPP4	Dipeptidyl peptidase 4 OS=Homo sapiens GN=DPP4 PE=1 SV=0	Enzymes	DPP4
HSK7653	HSK7653	HSK7653				Phase 3	Small Molecule		DPP4	Dipeptidyl peptidase 4 OS=Homo sapiens GN=DPP4 PE=1 SV=1	Enzymes	DPP4
Evogliptin	Suganon; evogliptin	EVOGLIPTIN		Approved in South Korea		Phase 3 and phase 4	Small Molecule		DPP4	Dipeptidyl peptidase 4 OS=Homo sapiens GN=DPP4 PE=1 SV=2	Enzymes	DPP4
Gemigliptin	LC15-0444	gemigliptin		Approved in China, South Korea		Phase 3 and phase 4	Small Molecule		DPP4	Dipeptidyl peptidase 4 OS=Homo sapiens GN=DPP4 PE=1 SV=2	Enzymes	DPP4
Omarigliptin	MK-3102; omarigliptin	Omarigliptin		Approved in Japan		Phase 3 and phase 4	Small Molecule		DPP4	Dipeptidyl peptidase 4 OS=Homo sapiens GN=DPP4 PE=1 SV=2	Enzymes	DPP4
Teneligliptin	MP-513	Teneligliptin		Approved in Japan		Phase 3 and phase 4	Small Molecule		DPP4	Dipeptidyl peptidase 4 OS=Homo sapiens GN=DPP4 PE=1 SV=2	Enzymes	DPP4
TQ-F3083	TQ-F3083	TQ-F3083				Phase 2	Small Molecule		DPP4	Dipeptidyl peptidase 4 OS=Homo sapiens GN=DPP4 PE=1 SV=2	Enzymes	DPP4
Trelagliptin	SYR-472; SYR111472 succinate; TAK-472; Trelagliptin succinate; Zafatek	Trelagliptin		Approved in Japan		Phase 3 and phase 4	Small Molecule		DPP4	Dipeptidyl peptidase 4 OS=Homo sapiens GN=DPP4 PE=1 SV=2	Enzymes	DPP4
Vildagliptin	vildagliptin; LAF 237; Galvus; Equa	VILDAGLIPTIN		Approved in Europe		Phase 3 and phase 4	Small Molecule		DPP4	Dipeptidyl peptidase 4 OS=Homo sapiens GN=DPP4 PE=1 SV=2	Enzymes	DPP4
ANAGLIPTIN	CWP-0403; SK-0403	ANAGLIPTIN		Approved in Japan		Phase 3 and phase 4	Small Molecule		DPP4	Dipeptidyl peptidase 4 OS=Homo sapiens GN=DPP4 PE=1 SV=2	Enzymes	DPP4
PF-06882961	Danuglipron	PF-06882961				Phase 2	Small Molecule		GLP1R	Glucagon like peptide 1 receptor	Receptors	GLP1R
PF-07081532	PF-07081532	PF-07081532				Phase 1	Small Molecule		GLP1R	Glucagon like peptide 1 receptor	Receptors	GLP1R
LY3502970	LY3502970	LY3502970				Phase 1	Small Molecule		GLP1R	Glucagon like peptide 1 receptor	Receptors	GLP1R
TTP273	TTP273	TTP273				Phase 2	Small Molecule		GLP1R	Glucagon-like Peptide 1 receptor OS=Homo sapiens GN=GLP1R PE=1 SV=1	Receptors	GLP1R
IVA-337	IVA-337	Lanifibranor				Phase 2	Small Molecule		PPARA, PPARD, PPARG	Peroxisome proliferator-activated receptor delta (PPAR-delta) (NUCI) (Nuclear hormone receptor 1) (NUC1) (Nuclear receptor subfamily 1 group C member 2) (Peroxisome proliferator-activated receptor beta) (PPAR-beta)	Receptors	TZD
GFT-505	GFT-505; GFT505	Elafibranor				Phase 2	Small Molecule		PPARA, PPARD, PPARG	Peroxisome proliferator-activated receptor gamma OS=Homo sapiens GN=PPARG PE=1 SV=3	Receptors	TZD
Chiglitazar	Chiglitazar	CS038				Phase 1	Small Molecule		PPARA, PPARG	Peroxisome proliferator-activated receptor alpha OS=Homo sapiens GN=PPARA PE=1 SV=2	Receptors	TZD
Lobeglitazone	CKD-501; Duvie	Lobeglitazone		Approved in South Korea		Phase 3 and phase 4	Small Molecule		PPARA, PPARG	Peroxisome proliferator-activated receptor alpha OS=Homo sapiens GN=PPARA PE=1 SV=2	Receptors	TZD
SY-008	SY-008	SY-008				Phase 1	Small Molecule		SGLT1	Sodium-glucose transporter 1	Transporters	SGLT
SY-009	SY-009	SY 009				Phase 1	Small Molecule		SGLT1	Sodium-glucose transporter 1	Transporters	SGLT
YG1699	YG1699	YG1699				Phase 1	Small Molecule		SGLT1; SGLT2	Sodium glucose transporter 1, Sodium glucose transporter 2	Transporters	SGLT
SOTAGLIFLOZIN	LP-802034; LX-4211; SAR 439954	SOTAGLIFLOZIN				Phase 3	Small Molecule		SGLT1; SGLT2	Sodium/glucose cotransporter 1	Transporters	SGLT
JTT-662	JTT-662	JTT-662				Phase 1	Small Molecule		SGLT2	Sodium glucose transporter 1	Transporters	SGLT
Bexagliflozin	THR-1442; Bexagliflozin	Bexagliflozin				Phase 3	Small Molecule		SGLT2	Sodium/glucose cotransporter 2 (Na(+)/glucose cotransporter 2) (Low affinity sodium-glucose cotransporter) (Solute carrier family 5 member 2)	Transporters	SGLT
DWP16001	DWP16001	Enavogliflozin				Phase 3	Small Molecule		SGLT2	Sodium/glucose cotransporter 2 (Na(+)/glucose cotransporter 2) (Low affinity sodium-glucose cotransporter) (Solute carrier family 5 member 2)	Transporters	SGLT
SHR-3824	SHR-3824	Henagliflozin				Phase 3	Small Molecule		SGLT2	Sodium/glucose cotransporter 2 (Na(+)/glucose cotransporter 2) (Low affinity sodium-glucose cotransporter) (Solute carrier family 5 member 2)	Transporters	SGLT
Ipragliflozin	ASP1941	Ipragliflozin		Approved in Japan		Phase 3 and phase 4	Small Molecule		SGLT2	Sodium/glucose cotransporter 2 (Na(+)/glucose cotransporter 2) (Low affinity sodium-glucose cotransporter) (Solute carrier family 5 member 2)	Transporters	SGLT
Janagliflozin	SGLT2 inhibitor - Sihuan	Janagliflozin				Phase 3	Small Molecule		SGLT2	Sodium/glucose cotransporter 2 (Na(+)/glucose cotransporter 2) (Low affinity sodium-glucose cotransporter) (Solute carrier family 5 member 2)	Transporters	SGLT
Remogliflozin	KGT-1681; BHV 091009; remogliflozin etabonate; BHV091009	Remogliflozin		Approved in India		Phase 2	Small Molecule		SGLT2	Sodium/glucose cotransporter 2 (Na(+)/glucose cotransporter 2) (Low affinity sodium-glucose cotransporter) (Solute carrier family 5 member 2)	Transporters	SGLT
Tofogliflozin	Tofogliflozin	Tofogliflozin	OLDER	Approved in Japan		Phase 4	Small Molecule		SGLT2	Sodium/glucose cotransporter 2 (Na(+)/glucose cotransporter 2) (Low affinity sodium-glucose cotransporter) (Solute carrier family 5 member 2)	Transporters	SGLT
CKD-396	CKD396	Lobeglitazone/sitagliptin			Combination	Phase 1	Small Molecule		PPARA, PPARG, DPP4	PPAR receptor, DPP4		TZD, DPP4
CDK-389	CKD389	CDK-389				Phase 3	Undisclosed			Undisclosed mechanism of action		Undisclosed mechanism of action
CKD-370	CKD370	CKD-370				Phase 1	Undisclosed			Undisclosed mechanism of action		Undisclosed mechanism of action
CKD-375	CKD375	CKD-375				Phase 3	Undisclosed			Undisclosed mechanism of action		Undisclosed mechanism of action
CKD-386	CKD-386	CKD-386				Phase 1	Undisclosed			Undisclosed mechanism of action		Undisclosed mechanism of action
CKD-387	CKD387	CKD-387				Phase 1	Undisclosed			Undisclosed mechanism of action		Undisclosed mechanism of action
CKD-393	CKD393	CKD-393				Phase 1	Undisclosed			Undisclosed mechanism of action		Undisclosed mechanism of action

## Sheet: ClinicalTrials
CT name	NCT Number	Title	Status	Study Results	Conditions	Interventions	Phases	Primary CompletionDate	Start Date Year	LastUpdatePosted
DBPR108	NCT02163278	A Multiple Ascending Dose Phase I Study of DBPR108 in Healthy Male Subjects	Completed	No Results Available	Diabetes Mellitus, Type 2	Drug: DBPR108|Drug: matching placebo	Phase 1	2015	2014	2016
Evogliptin	NCT02375139	A Clinical Trial to Investigate Safety/Tolerability and Pharmacokinetics of DA-1229_01(Evogliptin/Metformin XR 2.5/500 mg x 2 Tablets) Compared to Co-administration of Evogliptin 5 mg and Metformin XR 1000 mg in Healthy Male Volunteers	Completed	No Results Available	Type 2 Diabetes Mellitus	Drug: DA-1229_01|Drug: E+M	Phase 1	2015	2015	2015
HMS-5552	NCT02386982	Beta Cell Function and Related Pharmacodynamics of HMS5552 in T2DM Patients	Completed	No Results Available	Type 2 Diabetes	Drug: HMS5552	Phase 1	2015	2015	2015
HMS-5552	NCT02597400	Drug-Drug Interaction Study of Glucokinase Activator HMS5552 and Metformin in T2DM	Completed	No Results Available	Type 2 Diabetes Mellitus	Drug: Metformin|Drug: HMS5552	Phase 1	2015	2015	2016
Lobeglitazone	NCT02627027	A Clinical Study to Compare the Pharmacokinetic Characteristics of CKD-395 0.25/750 mg in Healthy Male Volunteers	Completed	No Results Available	Diabetes Mellitus, Type II	Drug: Duvie Tab. 0.5mg, Glucodaun OR Tab. 750mg|Drug: CKD-395 0.25/750mg	Phase 1	2015	2015	2016
Lobeglitazone	NCT02565368	A Clinical Study to Compare the Pharmacokinetic Characteristics of CKD-395 0.5/1000 mg in Healthy Male Volunteers	Completed	No Results Available	Diabetes Mellitus, Type II	Drug: Duvie Tab. 0.5mg, Glucophage XR Tab. 1000mg|Drug: CKD-395 0.5/1000mg	Phase 1	2015	2015	2015
Lobeglitazone	NCT02648854	Investigate the Effect of Food on the Pharmacokinetic Characteristics of CKD-395 in Healthy Male Volunteers	Completed	No Results Available	Diabetes Mellitus, Type II	Drug: CKD-395 0.5(Lobeglitazone)/1000(Metformin)mg 1T	Phase 1	2015	2015	2016
LY2944876	NCT02119819	A Study to Compare a New Drug for Type 2 Diabetes to Placebo and to a Treatment Already Available for Type 2 Diabetes	Completed	No Results Available	Diabetes Mellitus, Type 2	Drug: LY2944876|Drug: Exenatide extended-release|Drug: Placebo	Phase 2	2015	2014	2016
MEDI0382	NCT02394314	A Phase 1, Single Dose Study to Evaluate the Safety and Pharmacokinetics of MEDI0382 in Healthy Volunteers	Completed	No Results Available	Healthy Volunteers	Drug: MEDI0382|Drug: Placebo	Phase 1	2015	2015	2015
MLR-1023	NCT02317796	Adult Subjects With Uncontrolled Type 2 Diabetes	Completed	No Results Available	Type 2 Diabetes	Drug: MLR-1023	Phase 2	2015	2014	2016
NN1953	NCT02304627	Effect of Food on the Pharmacokinetics of NNC0123-0000-0338 in a Tablet Formulation in Healthy Subjects	Completed	No Results Available	Diabetes|Healthy	Drug: insulin 338 (GIPET I)	Phase 1	2015	2014	2019
NN1953	NCT02470039	Trial to Compare NNC0123-0000-0338 in a Tablet Formulation and Insulin Glargine in Subjects With Type 2 Diabetes Currently Treated With Oral Antidiabetic Therapy	Completed	No Results Available	Diabetes|Diabetes Mellitus, Type 2	Drug: insulin 338 (GIPET I)|Drug: insulin glargine|Drug: placebo	Phase 2	2015	2015	2019
SHR-3824	NCT02500485	The Drug-drug Interaction of SHR3824 and SP2086	Unknown status	No Results Available	Type 2 Diabetes	Drug: SHR3824, SP2086	Phase 1	2015	2015	2015
Anagliptin	NCT02312427	DPP-4 Inhibitor and Serum BNP Level of Diabetic Patients With Congestive Heart Failure	Completed	No Results Available	Heart Failure|Diabetes Mellitus	Drug: Suspending DPP-4 inhibitor, in outpatient service|Drug: Starting DPP-4 inhibitor after treatment of heart failure|Drug: Suspending DPP-4 inhibitor after treatment of heart failure	Phase 4	2016	2015	2018
BAY81-9783	NCT01915264	GLucobay M - Evaluation Of Safety and Effectiveness in Type 2 Diabetes Not Well Controlled on Monotherapy in Real Life Practice	Withdrawn	No Results Available	Diabetes Mellitus, Type 2	Drug: Acarbose/Metformin (Glucobay M, BAY81-9783)		2016	2015	2016
Bexagliflozin	NCT02390050	A Dose Range Finding Study to Evaluate the Effect of Bexagliflozin Tablets in Subjects With Type 2 Diabetes Mellitus	Completed	No Results Available	Diabetes Mellitus, Type 2	Drug: Bexagliflozin tablets|Drug: Bexagliflozin tablets, placebo	Phase 2	2016	2015	2019
Bexagliflozin	NCT02820298	Study to Evaluate the Effects of a High-Fat Meal on Bexagliflozin in Healthy Subjects	Completed	No Results Available	Type 2 Diabetes Mellitus	Drug: Bexagliflozin	Phase 1	2016	2016	2019
CKD-396	NCT02827890	CKD-396 Drug-drug Interaction Study(B) (CKD-396 DDI(B) P1)	Completed	No Results Available	Diabetes Mellitus Type 2	Drug: Januvia Tab. 100mg|Drug: Januvia Tab. 100mg + Duvie Tab. 0.5mg	Phase 1	2016	2016	2017
CKD-396	NCT02824874	CKD-396 Drug-drug Interaction Study(A) (CKD-396 DDI(A) P1)	Completed	No Results Available	Diabetes Mellitus, Type II	Drug: Duvie Tab. 0.5mg|Drug: Duvie Tab. 0.5mg + Januvia Tab. 100mg	Phase 1	2016	2016	2016
Evogliptin	NCT02753803	Pharmacokinetic/Pharmacodynamic Drug-drug Interaction of Evogliptin 5 mg and Pioglitazone 30 mg	Completed	No Results Available	Type 2 Diabetes	Drug: Evogliptin, Pioglitazone, Evogliptin+Pioglitazone|Drug: Pioglitazone, Evogliptin, Evogliptin+Pioglitazone|Drug: Evogliptin, Evogliptin+Pioglitazone, Pioglitazone|Drug: Pioglitazone, Evogliptin+Pioglitazone, Evogliptin|Drug: Evogliptin+Pioglitazone, Evogliptin, Pioglitazone|Drug: Evogliptin+Pioglitazone, Pioglitazone, Evogliptin	Phase 1	2016	2016	2017
Evogliptin	NCT02587975	Effect of Evogliptin on Bone Metabolism in Human	Unknown status	No Results Available	Diabetes Mellitus, Type 2|Osteoporosis	Drug: Evogliptin	Phase 4	2016	2016	2016
Gemigliptin	NCT03310749	An Assessment of Pharmacokinetic Gemigliptin and Metformin Interactions in Healthy Mexican Volunteers	Completed	No Results Available	Diabetes Mellitus, Type 2	Drug: Gemigliptin|Drug: Gemigliptin 50 mg q.d. + metformin 1000 mg twice a day|Drug: Metformin	Phase 1	2016	2016	2017
GK1-399	NCT02405260	Add Glucokinase Activator to Target A1c	Completed	No Results Available	Diabetes Mellitus, Type 2	Drug: TTP399 400 mg|Drug: TTP399 800 mg|Drug: Sitagliptin 100 mg|Drug: Placebo	Phase 2	2016	2015	2017
GWP42004	NCT02053272	A Study of GWP42004 as Add on to Metformin in the Treatment of Participants With Type 2 Diabetes	Completed	No Results Available	Diabetes Mellitus, Type 2	Drug: GWP42004|Drug: Placebo	Phase 2	2016	2014	2016
HMS-5552	NCT02561338	A Multi-center 12-week Study of HMS5552 in T2DM	Completed	Has Results	Diabetes Mellitus, Type 2	Drug: HMS5552|Other: Placebo	Phase 2	2016	2015	2020
Ipragliflozin	NCT02529449	Pharmacodynamics, Pharmacokinetics, and Safety of ASP1941 in Patients With Type 1 Diabetes Mellitus	Completed	No Results Available	Type 1 Diabetes Mellitus	Drug: Placebo|Drug: ASP1941	Phase 2	2016	2015	2019
Ipragliflozin	NCT02577016	Double-blind Sitagliptin Add-on Study in Japanese Participants With Type 2 Diabetes Mellitus Who Have Inadequate Glycemic Control on Ipragliflozin (MK-0431J-842)	Completed	Has Results	Type 2 Diabetes Mellitus	Drug: Sitagliptin|Drug: Placebo|Drug: Ipragliflozin	Phase 3	2016	2015	2018
Ipragliflozin	NCT02577003	Double-blind Ipragliflozin Add-on Study in Japanese Participants With Type 2 Diabetes Mellitus Who Have Inadequate Glycemic Control on Sitagliptin (MK-0431J-843)	Completed	Has Results	Type 2 Diabetes Mellitus	Drug: Ipragliflozin|Drug: Placebo|Drug: Sitagliptin	Phase 3	2016	2015	2018
ISIS-GCCRRx	NCT02583919	Safety, Tolerability and Efficacy of ISIS-GCGRRx in Patients With Type 2 Diabetes	Completed	No Results Available	Type 2 Diabetes	Drug: ISIS-GCGRRx- Dose Level 1|Drug: ISIS-GCGRRx- Dose Level 2|Drug: Placebo	Phase 2	2016	2015	2018
ISIS-GCCRRx	NCT02824003	Study to Evaluate the Effect of ISIS GCGRRx on Hepatic Lipid and Glycogen Content in Type 2 Diabetes	Completed	No Results Available	Type 2 Diabetes	Drug: ISIS-GCGRRx|Drug: Placebo	Phase 2	2016	2016	2018
JNJ-64565111	NCT02862431	Study to Assess Safety, Tolerability, Pharmacokinetics and Pharmacodynamics of JNJ-64565111 in Type 2 Diabetes Mellitus (T2DM)	Terminated	No Results Available	Diabetes Mellitus, Type 2	Drug: JNJ-64565111|Drug: Placebo	Phase 1	2016	2016	2018
KD026	NCT02434744	Study of KD026 in Combination With Metformin in Subjects With Type 2 Diabetes Mellitus	Completed	No Results Available	Type 2 Diabetes Mellitus	Drug: KD026|Drug: Placebo|Drug: Metformin	Phase 2	2016	2015	2016
LGD-6972	NCT02672839	A Comparison Study of the Bioavailability of a Capsule Formulation of LGD-6972 to an Oral Solution Formulation	Completed	No Results Available	Type 2 Diabetes Mellitus (T2DM)	Drug: LGD-6972 Solution|Drug: LGD-6972 Capsules	Phase 1	2016	2016	2016
Lobeglitazone	NCT02827890	CKD-396 Drug-drug Interaction Study(B) (CKD-396 DDI(B) P1)	Completed	No Results Available	Diabetes Mellitus Type 2	Drug: Januvia Tab. 100mg|Drug: Januvia Tab. 100mg + Duvie Tab. 0.5mg	Phase 1	2016	2016	2017
Lobeglitazone	NCT02824874	CKD-396 Drug-drug Interaction Study(A) (CKD-396 DDI(A) P1)	Completed	No Results Available	Diabetes Mellitus, Type II	Drug: Duvie Tab. 0.5mg|Drug: Duvie Tab. 0.5mg + Januvia Tab. 100mg	Phase 1	2016	2016	2016
Lobeglitazone	NCT02685774	A Clinical Study to Compare the Pharmacokinetic Characteristics of CKD-395 0.25/500mg in Healthy Male Volunteers	Completed	No Results Available	Diabetes Mellitus, Type II	Drug: Duvie Tab. 0.5mg, Glucophage XR Tab. 500mg|Drug: CKD-395 0.25/500mg	Phase 1	2016	2016	2017
Lobeglitazone	NCT02854748	Evaluate the Drug-drugs Interaction Between Lobeglitazone and Empagliflozin	Unknown status	No Results Available	Diabetes Mellitus, Type II	Drug: Empagliflozin 25mg|Drug: Lobeglitazone 0.5mg|Drug: Empagliflozin 25mg/Lobeglitazone 0.5mg	Phase 1	2016	2016	2016
Lobeglitazone	NCT02480465	Efficacy and Safety of Lobeglitazone Versus Sitagliptin	Unknown status	No Results Available	Diabetes Mellitus, Type 2	Drug: Lobelitazone 0.5mg|Drug: Sitagliptin 100mg	Phase 4	2016	2015	2015
NNC0143-0406	NCT02612844	A Trial Investigating the Safety, Tolerability, Pharmacokinetics and Pharmacodynamics of Subcutaneous NNC0143-0406 A 0.6 mmol/L in Subjects With Type 1 Diabetes	Completed	No Results Available	Diabetes|Diabetes Mellitus, Type 1	Drug: NNC0143-0406|Drug: insulin aspart	Phase 1	2016	2015	2017
PB-119	NCT03062774	Continuous Multiple Dose PB-119 Injection in Health Volunteers	Completed	No Results Available	Type2 Diabetes Mellitus	Biological: PB-119 injection	Phase 1	2016	2014	2017
PB-119	NCT03059719	Clinical Trial for PB-119 in Subjects With Type 2 Diabetes Mellitus	Completed	No Results Available	Type II Diabetes Mellitus	Biological: Exenatide injection(Byetta)|Biological: PB-119 injection	Phase 1	2016	2015	2017
PB-119	NCT03072407	MAD Study to Evaluate the Safety, Tolerability, Pharmacokinetics and Pharmacodynamics of PB-119 to Subjects With T2DM	Completed	No Results Available	Type2 Diabetes Mellitus	Biological: PB-119 injection|Biological: PB-119 injection placebo	Phase 1	2016	2015	2018
PBI-4050	NCT02562573	Study to Evaluate the Safety and Tolerability of PBI-4050 in Type 2 Diabetes Patients With Metabolic Syndrome	Completed	No Results Available	Type 2 Diabetes|Metabolic Syndrome	Drug: PBI4050	Phase 2	2016	2015	2017
Remogliflozin	NCT02537470	Safety and Efficacy of Biphasic Remogliflozin Etabonate in the Treatment of Type 2 Diabetes	Completed	No Results Available	Type 2 Diabetes Mellitus|Diabetes Mellitus, Type 2	Drug: Biphasic Remogliflozin Etabonate|Other: Placebo	Phase 2	2016	2015	2018
SHR-3824	NCT02366351	The PK/PD, Efficacy, Safety and Tolerability Study of SHR3824 in Type 2 Diabetes Mellitus Patients	Unknown status	No Results Available	Type 2 Diabetes Mellitus	Drug: SHR3824|Drug: Placebo	Phase 1	2016	2015	2015
SHR-3824	NCT02366377	The PK/PD, Efficacy, Safety and Tolerability Study of SHR3824 in Combination With Metformin in Type 2 Diabetes Mellitus Patients	Unknown status	No Results Available	Type 2 Diabetes Mellitus	Drug: SHR3824|Drug: Placebo|Drug: Metformin	Phase 1	2016	2015	2015
Sotagliflozin	NCT02383940	Efficacy and Safety of Sotagliflozin in Young Adult Patients With Type 1 Diabetes Mellitus and Elevated Hemoglobin A1C	Completed	Has Results	Type 1 Diabetes Mellitus	Drug: Sotagliflozin|Drug: Placebo	Phase 2	2016	2015	2020
Sotagliflozin	NCT02459899	Dose-ranging Study in Patients With Type 1 Diabetes Mellitus	Completed	Has Results	Type 1 Diabetes Mellitus	Drug: Placebo|Drug: Sotagliflozin	Phase 2	2016	2015	2020
Sotagliflozin	NCT02384941	Efficacy, Safety, and Tolerability Study of Sotagliflozin as Adjunct Therapy in Adult Patients With Type 1 Diabetes Mellitus Who Have Inadequate Glycemic Control With Insulin Therapy	Completed	Has Results	Type 1 Diabetes Mellitus	Drug: Placebo|Drug: Sotagliflozin	Phase 3	2016	2015	2020
Sotagliflozin	NCT02421510	Efficacy, Safety, and Tolerability Study of Sotagliflozin as Adjunct Therapy in Adult Patients With Type 1 Diabetes Mellitus Who Have Inadequate Glycemic Control With Insulin Therapy	Completed	Has Results	Type 1 Diabetes Mellitus	Drug: Sotagliflozin|Drug: Placebo	Phase 3	2016	2015	2020
Sotagliflozin	NCT02940379	A Drug to Drug Interaction Study of Sotagliflozin With Midazolam and Metoprolol	Completed	No Results Available	Type 2 Diabetes Mellitus	Drug: sotagliflozin (SAR439954)|Drug: midazolam|Drug: metoprolol	Phase 1	2016	2016	2017
Teneligliptin	NCT02354222	Confirmatory Study of MT-2412 in Japanese Patients With Type 2 Diabetes (Add-on Study of Teneligliptin)	Completed	Has Results	Type 2 Diabetes Mellitus	Drug: Canagliflozin|Drug: Teneligliptin|Drug: Placebo	Phase 3	2016	2015	2018
Teneligliptin	NCT02354235	Confirmatory Study of MT-2412 in Japanese Patients With Type 2 Diabetes (Add-on Study of Canagliflozin)	Completed	Has Results	Type 2 Diabetes Mellitus	Drug: Teneligliptin|Drug: Canagliflozin|Drug: Placebo	Phase 3	2016	2015	2018
Teneligliptin	NCT02312427	DPP-4 Inhibitor and Serum BNP Level of Diabetic Patients With Congestive Heart Failure	Completed	No Results Available	Heart Failure|Diabetes Mellitus	Drug: Suspending DPP-4 inhibitor, in outpatient service|Drug: Starting DPP-4 inhibitor after treatment of heart failure|Drug: Suspending DPP-4 inhibitor after treatment of heart failure	Phase 4	2016	2015	2018
Teneligliptin	NCT02512523	Exploratory Study to Compare the Effects of Tenelia® or Januvia® on Glucose Variability in add-on to Metformin (CGMS Study)	Unknown status	No Results Available	Type 2 Diabetes Mellitus	Drug: Teneligliptin|Drug: Sitagliptin	Phase 4	2016	2015	2015
Tofogliflozin	NCT02201004	TOFO Insulin Combination Trial	Completed		Type 2 Diabetes Mellitus	Tofogliflozin	Phase 4	2016	2014	2017
TTP273	NCT02653599	A Study to Evaluate Safety and Efficacy of TTP273 for 12 Weeks in Subjects With Type 2 Diabetes	Completed	No Results Available	Type 2 Diabetes Mellitus	Drug: TTP273|Drug: Placebo	Phase 2	2016	2015	2017
Vildagliptin	NCT03819127	Vildagliptin in Older Adults With Diabetes and Mild Cognitive Impairment	Completed	No Results Available	Mild Cognitive Impairment	Drug: Vildagliptin 50 MG Oral Tablet|Drug: Metformin Pill	Phase 4	2016	2015	2019
Vildagliptin	NCT02312427	DPP-4 Inhibitor and Serum BNP Level of Diabetic Patients With Congestive Heart Failure	Completed	No Results Available	Heart Failure|Diabetes Mellitus	Drug: Suspending DPP-4 inhibitor, in outpatient service|Drug: Starting DPP-4 inhibitor after treatment of heart failure|Drug: Suspending DPP-4 inhibitor after treatment of heart failure	Phase 4	2016	2015	2018
Vildagliptin	NCT02832999	Short Term Effect of Liraglutide Versus Vildagliptine on Insulin Secretion and Insulin Sensitivity in Type 2 Diabetes	Completed	No Results Available	Type 2 Diabetes Mellitus	Drug: sub cutaneous liraglutide|Drug: Oral Vildagliptin	Phase 4	2016	2016	2017
Anagliptin	NCT03014479	Study of the QOL Evaluation of Trelagliptin in Patients With Type 2 Diabetes Mellitus	Completed	Has Results	Type 2 Diabetes	Drug: Trelagliptin|Drug: Daily DPP-4 inhibitor	Phase 4	2017	2017	2019
Anagliptin	NCT02528019	Metabolic and Cardiovascular Effects of Dipeptidyl Peptidase-4 (DPP-4) or Sodium-glucose Co-transporter Type 2 (SGLT2) Inhibitors	Unknown status	No Results Available	Effects of the DPP-4 Inhibitors or SGLT2 Inhibitors on the Protective Actions for Diabetic Complications	Drug: DPP-4 inhibiotors|Drug: SGLT2 inhibitors|Drug: Glimepiride	Phase 4	2017	2015	2015
Bexagliflozin	NCT02956044	Interaction of Bexagliflozin With Metformin, Glimepiride and Sitagliptin	Completed	No Results Available	Type2 Diabetes Mellitus	Drug: Bexagliflozin|Drug: Metformin|Drug: Glimepiride|Drug: Sitagliptin	Phase 1	2017	2016	2019
Bexagliflozin	NCT03167411	Bexagliflozin Drug/Drug Interaction Study With Exenatide Injection	Completed	No Results Available	Type2 Diabetes Mellitus	Drug: Bexagliflozin|Drug: Exenatide Injection	Phase 1	2017	2017	2019
Bexagliflozin	NCT03197324	Bexagliflozin Drug/Drug Interaction Study With Digoxin	Completed	No Results Available	Type2 Diabetes Mellitus	Drug: Bexagliflozin|Drug: Digoxin	Phase 1	2017	2017	2019
Bexagliflozin	NCT03296800	Study to Evaluate Effects of Probenecid, Rifampin and Verapamil on Bexagliflozin in Healthy Subjects	Completed	No Results Available	Type 2 Diabetes Mellitus	Drug: Bexagliflozin|Drug: Probenecid|Drug: Rifampin|Drug: Verapamil	Phase 1	2017	2017	2019
Bexagliflozin	NCT02715258	Safety and Efficacy of Bexagliflozin as Monotherapy in Patients With Type 2 Diabetes	Completed	No Results Available	Type 2 Diabetes Mellitus	Drug: Bexagliflozin|Drug: Placebo	Phase 3	2017	2016	2019
Chiglitazar	NCT02173457	Study of Chiglitazar Compare With Sitagliptin in Type 2 Diabetes Patients	Completed	No Results Available	Type 2 Diabetes	Drug: Chiglitazar|Drug: Sitagliptin	Phase 3	2017	2014	2019
Chiglitazar	NCT02121717	Study of Chiglitazar Compare With Placebo in Type 2 Diabetes Patients	Completed	No Results Available	Type 2 Diabetes	Drug: Chiglitazar|Drug: Placebo	Phase 3	2017	2014	2019
DA-1241	NCT03061981	A Study To Evaluate The Safety,Tolerability, PK and PD Of DA-1241 In Healthy Male Subjects	Completed	No Results Available	Diabetes Mellitus, Type 2	Drug: Placebo|Drug: Metformin|Drug: DA-1241	Phase 1	2017	2017	2017
Dasiglucagon	NCT02916251	ZP4207(Dasiglucagon) Administered to T1D Patients to Assess the PK and PD Compared to Marketed Glucagon	Completed	No Results Available	Diabetes Mellitus Type 1	Drug: ZP4207(dasiglucagon) glucagon analogue|Drug: Glucagon (Native glucagon)	Phase 2	2017	2016	2017
Dasiglucagon	NCT02971228	Feasibility Trial Testing the Bionic Pancreas With ZP4207	Completed	Has Results	Diabetes Mellitus, Type 1	Drug: Insulin Lispro|Drug: ZP4207 (dasiglucagon)|Drug: Glucagon|Device: iPhone-based bionic pancreas|Device: iLet-based bionic pancreas	Phase 2	2017	2016	2021
Evogliptin	NCT02954822	Pharmacokinetic/Pharmacodynamic Drug-drug Interaction of Evogliptin 5mg and Glimepiride 4mg	Completed	No Results Available	Type2 Diabetes	Drug: Evogliptin→Evogliptin+Glimepiride→Glimepiride|Drug: Glimepiride→Evogliptin→Evogliptin+Glimepiride	Phase 1	2017	2016	2017
HM12470	NCT02302443	A First-in-human Study to Evaluate the Safety, Tolerability, Pharmacokinetics and Pharmacodynamics of HM12470	Completed	No Results Available	Diabetes Mellitus	Biological: HM12470|Biological: Active comparator	Phase 1	2017	2015	2017
HMS-5552	NCT04080596	DDI Study to Investigate the Impact of Itraconazole on the Pharmacokinetics of Dorzagliatin	Completed	No Results Available	Drug Interaction	Drug: Dorzagliatin	Phase 1	2017	2017	2019
HTI2088	NCT02750007	Tolerability to HS-20004 With Titration Administration in Type 2 Diabetic Patients	Unknown status	No Results Available	Diabetes Mellitus, Type 2	Drug: HS-20004	Phase 1	2017	2015	2016
HTI2088	NCT03203811	A Phase 1, Study to Evaluate HTI-2088 Tablet	Completed	No Results Available	Diabetes	Drug: HTI-2088|Drug: Placebo	Phase 1	2017	2017	2017
Ipragliflozin	NCT02452632	A Study to Assess the Efficacy and Safety of ASP1941 in Subjects With Type 2 Diabetes Mellitus Who Have Inadequate Glycemic Control on Metformin and Sitagliptin	Completed	No Results Available	Type 2 Diabetes Mellitus	Drug: ASP1941|Drug: Placebo	Phase 3	2017	2015	2018
Ipragliflozin	NCT02564211	Ipragliflozin Add-on Long-term Study in Japanese Participants With Type 2 Diabetes Mellitus on Sitagliptin (MK-0431J-849)	Completed	Has Results	Type 2 Diabetes Mellitus	Drug: Ipragliflozin|Drug: Sitagliptin	Phase 3	2017	2015	2018
Ipragliflozin	NCT02794792	A Study to Assess the Efficacy and Safety of Ipragliflozin in Subjects With Type 2 Diabetes Mellitus Who Have Inadequate Glycemic Control on Metformin	Completed	No Results Available	Type 2 Diabetes Mellitus	Drug: Ipragliflozin L-proline|Drug: Metformin|Drug: Placebo	Phase 3	2017	2016	2018
Ipragliflozin	NCT02875821	Effects of Ipragliflozin on Excessive Fat in Type 2 Diabetes Patients With Non-alcoholic Fatty Liver Disease Treated With Metformin and Pioglitazone	Completed	No Results Available	Type 2 Diabetes With Non-alcoholic Fatty Liver (NAFLD)	Drug: Ipragliflozin|Drug: metformin with pioglitazone	Phase 4	2017	2016	2017
Ipragliflozin	NCT02847091	Study of Ipragliflozin in Patients With Type 2 Diabetes Mellitus Receiving Insulin Therapy	Completed	No Results Available	Type 2 Diabetes Mellitus	Drug: Ipragliflozin|Drug: Insulin	Phase 4	2017	2016	2018
Ipragliflozin	NCT02897219	A Study of ASP1941 in Combination With Insulin in Patients With Type 1 Diabetes Mellitus	Completed	No Results Available	Type 1 Diabetes Mellitus	Drug: ipragliflozin|Drug: Placebo|Other: Insulin Therapy	Phase 3	2017	2016	2019
Ipragliflozin	NCT02791035	Correlation Between Change of HbA1c, Urinary Glucose Excretion and Other Factors in Patients Treated With Ipragliflozin	Completed	No Results Available	Type 2 Diabetes Mellitus	Drug: Oral administration of Ipragliflozin	Phase 4	2017	2016	2017
Ipragliflozin	NCT02528019	Metabolic and Cardiovascular Effects of Dipeptidyl Peptidase-4 (DPP-4) or Sodium-glucose Co-transporter Type 2 (SGLT2) Inhibitors	Unknown status	No Results Available	Effects of the DPP-4 Inhibitors or SGLT2 Inhibitors on the Protective Actions for Diabetic Complications	Drug: DPP-4 inhibiotors|Drug: SGLT2 inhibitors|Drug: Glimepiride	Phase 4	2017	2015	2015
LGD-6972	NCT02851849	A Study of LGD-6972 in Patients With Type 2 Diabetes Mellitus	Completed	No Results Available	Type 2 Diabetes Mellitus	Drug: LGD-6972-5 mg|Drug: LGD-6972-10 mg|Drug: LGD-6972-15 mg|Other: Placebo	Phase 2	2017	2016	2018
LY3209590	NCT02942914	A Study of LY3209590 in Healthy Participants and Participants With Type 2 Diabetes	Completed	No Results Available	Diabetes Mellitus, Type 2	Drug: LY3209590|Drug: Placebo|Drug: Insulin Glargine	Phase 1	2017	2016	2017
MEDI0382	NCT02548585	A Multiple-ascending-dose Study to Evaluate the Efficacy, Safety, and Pharmacokinetics (PK) of MEDI0382 in Overweight and Obese Participants With Type 2 Diabetes Mellitus	Completed	Has Results	Type 2 Diabetes Mellitus	Drug: MEDI0382|Drug: Placebo	Phase 1|Phase 2	2017	2015	2019
NNC0143-0406	NCT02938572	A Randomised Proof-of-Principle Trial Investigating Pharmacodynamics, Pharmacokinetics, and Safety of NNC0143-0406 in Subjects With Type 1 Diabetes Mellitus	Completed	No Results Available	Diabetes|Diabetes Mellitus, Type 1	Drug: NNC0143-0406|Drug: Insulin Aspart	Phase 1	2017	2016	2018
Omarigliptin	NCT03362398	Omarigliptin & Trelagliptin in Twelve Healthy Egyptian Volunteers	Completed	No Results Available	Diabetes Mellitus, Type 2	Drug: Omarigliptin 25 mg|Drug: Trelagliptin 100 mg	Not Applicable	2017	2017	2017
PBI-4050	NCT02739217	Safety and Tolerability of PBI-4050 and Its Effects on the Biomarkers in Subjects With Alström Syndrome	Completed	No Results Available	Inflammation and Fibrosis|Diabetes	Drug: PBI-4050	Phase 2	2017	2016	2018
REMD-477	NCT02715193	Single-dose Study to Evaluate Safety, Tolerability, and Pharmacodynamics of REMD-477 in Subjects With Type 1 Diabetes Mellitus	Completed	No Results Available	Type 1 Diabetes Mellitus|Diabetes	Biological: REMD-477|Biological: Placebo Comparator	Phase 1	2017	2016	2017
SHR-3824	NCT03329118	Drug-drug Interaction Between Simvastatin and SHR3824	Unknown status	No Results Available	Type 2 Diabetes	Drug: SHR3824, Simvastatin	Phase 1	2017	2017	2017
SHR-3824	NCT03159832	Safety and Pharmacokinetics/Pharmacodynamics of SHR3824 in Type 2 Diabetes Patients With Renal Insufficient	Unknown status	No Results Available	Renal Insufficiency,Type 2 Diabetes	Drug: SHR3824	Phase 1	2017	2015	2017
Sotagliflozin	NCT02531035	A Phase 3 Study to Evaluate the Safety of Sotagliflozin in Patients With Type 1 Diabetes Who Have Inadequate Glycemic Control With Insulin Therapy Alone	Completed	Has Results	Type 1 Diabetes Mellitus (T1DM)|High Level of Sugar (Glucose) in the Blood	Drug: Sotagliflozin|Drug: Placebo	Phase 3	2017	2015	2020
Sotagliflozin	NCT03174548	A Study to Evaluate the Effect of Food on the Pharmacokinetics of Sotagliflozin and to Explore the Relative Bioavailability in Healthy Subjects	Completed	No Results Available	Diabetes Mellitus	Drug: Sotagliflozin (SAR439954)	Phase 1	2017	2017	2017
Sotagliflozin	NCT03070678	Interaction Study to Evaluate the Effects of Mefenamic Acid on the Pharmacokinetics and Pharmacodynamics of Sotagliflozin in Healthy Male and Female Subjects	Completed	No Results Available	Diabetes Mellitus	Drug: Sotagliflozin (SAR439954)|Drug: Mefenamic acid	Phase 1	2017	2017	2017
Sotagliflozin	NCT03310944	Comparison of Sotagliflozin Prototype Tablets With Reference Tablet in Healthy Subjects	Completed	No Results Available	Type 1 Diabetes Mellitus|Type 2 Diabetes Mellitus	Drug: sotagliflozin (SAR439954)	Phase 1	2017	2017	2017
Sotagliflozin	NCT03063580	Effect of Rifampicin on the Pharmacokinetics and Pharmacodynamics of Sotagliflozin	Completed	No Results Available	Diabetes Mellitus	Drug: Sotagliflozin (SAR439954)|Drug: Rifampicin	Phase 1	2017	2017	2017
Sotagliflozin	NCT03211195	Sotagliflozin Bioequivalence Study	Completed	No Results Available	Type 2 Diabetes Mellitus	Drug: Sotagliflozin (SAR439954)	Phase 1	2017	2017	2017
SY-004	NCT03171623	The Assessment of Single-Dose Safety,Tolerability, Pharmacokinetics and Pharmacodynamic of Globalagliatin Hydrochloride	Completed	No Results Available	Hyperglycaemia (Diabetic)|Healthy Volunteers	Drug: globalagliatin hydrochloride|Drug: placebo	Phase 1	2017	2017	2018
Teneligliptin	NCT02567994	Tenelia Triple Combination Study	Completed	No Results Available	Type 2 Diabetes Mellitus	Drug: Teneligliptin	Phase 3	2017	2015	2018
Teneligliptin	NCT03014479	Study of the QOL Evaluation of Trelagliptin in Patients With Type 2 Diabetes Mellitus	Completed	Has Results	Type 2 Diabetes	Drug: Trelagliptin|Drug: Daily DPP-4 inhibitor	Phase 4	2017	2017	2019
Teneligliptin	NCT03009513	Teneligliptin-Glimepiride DDI Study	Completed	No Results Available	Diabetes Mellitus	Drug: Teneligliptin+Glimepiride	Phase 1	2017	2017	2018
Teneligliptin	NCT02528019	Metabolic and Cardiovascular Effects of Dipeptidyl Peptidase-4 (DPP-4) or Sodium-glucose Co-transporter Type 2 (SGLT2) Inhibitors	Unknown status	No Results Available	Effects of the DPP-4 Inhibitors or SGLT2 Inhibitors on the Protective Actions for Diabetic Complications	Drug: DPP-4 inhibiotors|Drug: SGLT2 inhibitors|Drug: Glimepiride	Phase 4	2017	2015	2015
Tofogliflozin	NCT02537834	Tofogliflozin GLP-1 Analogue Combination Trial	Completed		Type 2 Diabetes Mellitus	Tofogliflozin	Phase 4	2017	2015	2020
Trelagliptin	NCT02771093	An Exploratory Study of the Effects of Trelagliptin and Alogliptin on Glucose Variability in Patients With Type 2 Diabetes Mellitus	Completed	Has Results	Type 2 Diabetes Mellitus	Drug: Trelagliptin|Drug: Alogliptin	Phase 4	2017	2016	2019
Trelagliptin	NCT03014479	Study of the QOL Evaluation of Trelagliptin in Patients With Type 2 Diabetes Mellitus	Completed	Has Results	Type 2 Diabetes	Drug: Trelagliptin|Drug: Daily DPP-4 inhibitor	Phase 4	2017	2017	2019
Trelagliptin	NCT03362398	Omarigliptin & Trelagliptin in Twelve Healthy Egyptian Volunteers	Completed	No Results Available	Diabetes Mellitus, Type 2	Drug: Omarigliptin 25 mg|Drug: Trelagliptin 100 mg	Not Applicable	2017	2017	2017
Trelagliptin	NCT02528019	Metabolic and Cardiovascular Effects of Dipeptidyl Peptidase-4 (DPP-4) or Sodium-glucose Co-transporter Type 2 (SGLT2) Inhibitors	Unknown status	No Results Available	Effects of the DPP-4 Inhibitors or SGLT2 Inhibitors on the Protective Actions for Diabetic Complications	Drug: DPP-4 inhibiotors|Drug: SGLT2 inhibitors|Drug: Glimepiride	Phase 4	2017	2015	2015
Vildagliptin	NCT03253562	Metformin Versus Vildagliptin for Diabetic Hypertensive Patients	Completed	No Results Available	Reducing the Elevated Blood Pressure for Diabetic Hypertensive Patients	Drug: Metformin Pill|Drug: Vildagliptin 50 mg	Phase 4	2017	2017	2017
Vildagliptin	NCT04237493	Dosage Reduction and Acute Glycemic Complications in People With Type 2 Diabetes Who Fast During Ramadan	Completed	No Results Available	Diabetes Mellitus, Type 2	Drug: Metformin and Glimepiride (Low Dosage)|Drug: Metformin and Vildagliptin (Low Dosage)|Drug: Metformin and Insulin Glargine U100 (Low Dosage)|Drug: Metformin, Insulin Glargine U100, and Human Regular Insulin (Low Dosage)|Drug: Metformin and Glimepiride (Regular Dosage)|Drug: Metformin and Vildagliptin (Regular Dosage)|Drug: Metformin and Insulin Glargine U100 (Regular Dosage)|Drug: Metformin,…	Phase 4	2017	2017	2020
Vildagliptin	NCT03014479	Study of the QOL Evaluation of Trelagliptin in Patients With Type 2 Diabetes Mellitus	Completed	Has Results	Type 2 Diabetes	Drug: Trelagliptin|Drug: Daily DPP-4 inhibitor	Phase 4	2017	2017	2019
Vildagliptin	NCT02475070	Vildagliptin Versus Dapagliflozin on Glucagon	Completed	Has Results	Type 2 Diabetes	Drug: Vildagliptin|Drug: Dapagliflozin	Phase 4	2017	2016	2019
Vildagliptin	NCT02528019	Metabolic and Cardiovascular Effects of Dipeptidyl Peptidase-4 (DPP-4) or Sodium-glucose Co-transporter Type 2 (SGLT2) Inhibitors	Unknown status	No Results Available	Effects of the DPP-4 Inhibitors or SGLT2 Inhibitors on the Protective Actions for Diabetic Complications	Drug: DPP-4 inhibiotors|Drug: SGLT2 inhibitors|Drug: Glimepiride	Phase 4	2017	2015	2015
Vildagliptin	NCT02999841	Effect of Acarbose and Vildagliptin on Visceral Fat Distribution in Newly Diagnosed Type 2 Diabetes Patients	Unknown status	No Results Available	Diabetes Mellitus, Type 2|Obesity	Drug: Acarbose|Drug: Vildagliptin	Phase 4	2017	2016	2016
Anagliptin	NCT02330406	Randomized Evaluation of Anagliptin Versus Sitagliptin On Low-density lipoproteiN Cholesterol in Diabetes Trial	Completed	No Results Available	Dipeptidyl-Peptidase 4 Inhibitors|LDL Cholesterol|Glycosylated Hemoglobin|Diabetes Mellitus|Coronary Disease	Drug: Anagliptin|Drug: Sitagliptin	Phase 4	2018	2015	2019
Bexagliflozin	NCT02836873	Safety and Efficacy of Bexagliflozin in Type 2 Diabetes Mellitus Patients With Moderate Renal Impairment	Completed	No Results Available	Type 2 Diabetes Mellitus	Drug: Bexagliflozin|Drug: Placebo	Phase 3	2018	2016	2019
Bexagliflozin	NCT03115112	Safety and Efficacy of Bexagliflozin Compared to Sitagliptin as Add-on Therapy to Metformin in Type 2 Diabetes Subjects	Completed	No Results Available	Type 2 Diabetes Mellitus	Drug: Bexagliflozin|Drug: Sitagliptin|Drug: Placebo for sitagliptin|Drug: Placebo for bexagliflozin	Phase 3	2018	2017	2019
Bexagliflozin	NCT03557658	Safety and Efficacy of Bexagliflozin in Subjects With Moderate Hepatic Impairment	Completed	No Results Available	Type2 Diabetes Mellitus	Drug: Bexagliflozin	Phase 1	2018	2018	2019
Bexagliflozin	NCT03417076	Absolute Bioavailability Study With Bexagliflozin	Withdrawn	No Results Available	Type 2 Diabetes Mellitus	Drug: Bexagliflozin	Phase 1	2018	2018	2019
CKD-386	NCT03609606	A Study to Investigate Drug Interaction Between D326, D337, and D013 in Healthy Male Subjects	Completed	No Results Available	Dyslipidemias|Hypertension	Drug: D013, D326 and D337|Drug: D013|Drug: D326 and D337	Phase 1	2018	2018	2018
CKD-387	NCT03646799	Pharmacokinetics and Safety/Tolerability After Oral Administration of CKD-387 and D484 in Healthy Adults	Unknown status	No Results Available	Type II Diabetes	Drug: CKD-387|Drug: D484	Phase 1	2018	2018	2018
Dasiglucagon	NCT03378635	A Trial to Confirm the Efficacy and Safety of Dasiglucagon in the Treatment of Hypoglycemia in Type 1 Diabetes Subjects	Completed	No Results Available	Hypoglycemia|Diabetes Mellitus, Type 1	Drug: Dasiglucagon|Drug: GlucaGen|Drug: Placebo	Phase 3	2018	2017	2020
Dasiglucagon	NCT03216226	A Trial to Evaluate the Immunogenicity of Dasiglucagon and GlucaGen in Patients With Type 1 Diabetes Mellitus	Completed	Has Results	Hypoglycemia|Diabetes Mellitus, Type 1	Drug: dasiglucagon|Drug: GlucaGen	Phase 3	2018	2017	2021
Evogliptin	NCT02974504	Phase IV Clinical Trial to Investigate the Effect on Blood Glucose of Evogliptin in Patients With Type 2 Diabetes(EVERGREEN)	Completed	No Results Available	Type2 Diabetes	Drug: evogliptin|Drug: Linagliptin	Phase 4	2018	2016	2018
Evogliptin	NCT02754219	Pharmacokinetics and Safety of Evogliptin in Subjects With Hepatic Dysfunction	Completed	No Results Available	Liver Dysfunction	Drug: Evogliptin	Phase 1	2018	2016	2018
Evogliptin	NCT02689362	Evogliptin in Type 2 Diabetes Mellitus (EVOLUTION: EVOgLiptina no Diabetes Mellitus TIpO 2)	Completed	No Results Available	Diabetes Mellitus, Type 2	Drug: Evogliptin|Drug: Sitagliptin|Drug: Placebo Evogliptin|Drug: Placebo Sitagliptin	Phase 2	2018	2017	2018
Gemigliptin	NCT02831361	Trial to Evaluate the Efficacy and Safety of Gemigliptin Compared With Placebo Added on Insulin Alone or on Insulin in Combination With Metformin in Type 2 DM (ZEUS II Study)	Completed	No Results Available	Type 2 Diabetes Mellitus	Drug: Gemigliptin|Drug: Gemigliptin placebo|Drug: Metformin|Procedure: Diet/exercise questionnaire	Phase 3	2018	2016	2018
Gemigliptin	NCT03202563	Trial to Evaluate the Efficacy on Glycemic Variability and Safety of Gemigliptin Compared With Dapagliflozin Added on Metformin Alone or Diabetes Medication Naïve Patient in Type 2 Diabetes Mellitus (Stable II Study)	Completed	No Results Available	Type 2 Diabetes Mellitus	Drug: Gemigliptin 50mg|Drug: Dapagliflozin 10mg|Procedure: Diet/exercise questionnaire|Device: Continuous Glucose Monitoring System(CGMS)|Drug: Metformin	Phase 4	2018	2017	2019
Gemigliptin	NCT03565458	Gemigliptin, Dapagliflozin, Empagliflozin DDI Study	Unknown status	No Results Available	Type 2 Diabetes Mellitus	Drug: Gemigliptin|Drug: Dapagliflozin|Drug: Empagliflozin	Phase 1	2018	2018	2018
GX-G6	NCT03651466	Safety and Tolerability of GX-G6 in Healthy Male Subjects	Completed	No Results Available	Diabetes Mellitus	Drug: Gx-G6|Drug: Placebo	Phase 1	2018	2017	2018
HM12470	NCT03332849	Multiple Ascending Dose Study of HM12470 in Type 1 and Type 2 Diabetes Mellitus	Unknown status	No Results Available	Type1 Diabetes Mellitus|Type2 Diabetes Mellitus	Biological: HM12470	Phase 1	2018	2015	2017
Ipragliflozin	NCT03118713	A Study to Evaluate the Renal Protective Effect (Urine Albumin-to-Creatinine Ratio (UACR)), Efficacy and Safety of Ipragliflozin in Type 2 Diabetes Mellitus Patients With Albuminuria	Terminated	No Results Available	Type 2 Diabetes Mellitus	Drug: metformin|Drug: ipragliflozin|Drug: glimepiride	Phase 4	2018	2017	2020
ISIS 484137	NCT03334214		Completed		Hepatic Steatosis	ISIS 484137	Phase 2	2018	2017	2020
JNJ-64565111	NCT03235219	A Phase 1b Study to Assess Safety, Tolerability, Pharmacokinetics and Pharmacodynamics of Multiple Doses of JNJ-64565111 in Participants With Type 2 Diabetes Mellitus	Completed	No Results Available	Diabetes Mellitus, Type 2	Drug: JNJ-64565111|Drug: Placebo	Phase 1	2018	2017	2018
JY 09	NCT04354090	Safety, Tolerability, Pharmacodynamics and Pharmacokinetics of JY09	Completed	No Results Available	Diabetes Mellitus, Type 2	Drug: JY09	Phase 1	2018	2018	2020
Lobeglitazone	NCT03616392	Clinical Trial to Evaluate the Drug Drug Interaction of CKD-501 and D308	Completed	No Results Available	Diabetes Mellitus, Type II	Drug: D308, CKD-501	Phase 1	2018	2018	2018
LY3209590	NCT03367377	A Study of LY3209590 in Participants With Type 2 Diabetes	Completed	No Results Available	Diabetes Mellitus, Type 2	Drug: LY3209590|Drug: Insulin Glargine	Phase 1	2018	2018	2018
MEDI0382	NCT03235050	A Study to Evaluate the Efficacy and Safety of MEDI0382 in the Treatment of Overweight and Obese Subjects With Type 2 Diabetes	Completed	Has Results	Diabetes Mellitus, Type 2	Drug: MEDI0382 low dose|Drug: MEDI0382 mid dose|Drug: MEDI0382 high dose|Drug: Placebo|Drug: Liraglutide	Phase 2	2018	2017	2020
MEDI0382	NCT03244800	A Study to Investigate Different Doses of 0382 in Overweight and Obese Subjects With Type 2 Diabetes Mellitus.	Completed	Has Results	Type 2 Diabetes Mellitus	Drug: MEDI0382|Drug: Placebo	Phase 2	2018	2017	2019
MEDI0382	NCT03347968	Study to Compare Pharmacokinetics & Pharmacodynamics of Warfarin & Esmolol in the Absence & Presence of MEDI0382	Completed	No Results Available	Healthy Volunteers	Biological: MEDI0382|Drug: Warfarin|Drug: Esmolol	Phase 1	2018	2017	2018
MEDI0382	NCT03341013	A Pilot Study Investigating Bioequivalence Between a Single Dose of Formulation 2 and Formulation 3 of MEDI0382	Completed	No Results Available	Type 2 Diabetes Mellitus	Drug: MEDI0382 Formulation 2|Drug: MEDI0382 Formulation 3	Phase 1	2018	2017	2018
MEDI0382	NCT03444584	Study of MEDI0382 in Combination With Dapagliflozin and Metformin in Overweight/Obese Participants With Type 2 Diabetes	Completed	Has Results	Type 2 Diabetes Mellitus	Drug: MEDI0382|Drug: Placebo|Drug: Dapaglifozin|Drug: Metformin	Phase 2	2018	2018	2020
Omarigliptin	NCT02906709	Omarigliptin Add-on to Insulin in Japanese Participants With Type 2 Diabetes Mellitus (T2DM, MK-3102-039)	Completed	Has Results	Type 2 Diabetes Mellitus	Drug: Omarigliptin|Drug: Placebo|Biological: Insulin	Phase 4	2018	2016	2019
PBI-4050	NCT03081598	Study to Evaluate Safety, Efficacy of PBI-4050 & Its Effect on Relevant Biomarkers in T2DM Patients With Metabolic Syndrome	Terminated	No Results Available	Type 2 Diabetes Mellitus|Metabolic Syndrome	Drug: PBI-4050|Other: Placebo	Phase 2	2018	2017	2020
PXL770	NCT03395470	Safety, Tolerability and PK of PXL770 in Healthy Male Subjects	Completed	No Results Available	Metabolic Disease	Drug: PXL770|Drug: Placebo|Drug: Rosuvastatin	Phase 1	2018	2017	2018
REMD-477	NCT02455011	Dose Escalation Study to Evaluate Safety, Tolerability, Pharmacokinetics and Pharmacodynamics of REMD-477 in Subjects With Type 2 Diabetes Mellitus	Completed	No Results Available	Type 2 Diabetes Mellitus|Diabetes	Biological: REMD-477	Phase 1|Phase 2	2018	2015	2018
SHR-3824	NCT03159052	Efficacy and Safety of SHR3824 as Monotherapy in Subjects With Type 2 Diabetes	Unknown status	No Results Available	Type 2 Diabetes Mellitus	Drug: SHR3824|Drug: Placebo	Phase 3	2018	2017	2017
Sotagliflozin	NCT03387657	A Drug to Drug Interaction Study of Sotagliflozin With Hydrochlorothiazide	Completed	No Results Available	Type 2 Diabetes Mellitus	Drug: Sotagliflozin (SAR439954)|Drug: Hydrochlorothiazide	Phase 1	2018	2018	2018
Sotagliflozin	NCT03414723	A Drug-Drug Interaction Study Between Sotagliflozin and Ramipril	Completed	No Results Available	Diabetes Mellitus|Healthy Subjects	Drug: Sotagliflozin (SAR439954)|Drug: Ramipril	Phase 1	2018	2018	2020
Teneligliptin	NCT02916706	Efficacy and Safety of Teneligliptin in Chinese Patients With Type 2 Diabetes Mellitus	Completed	No Results Available	Type 2 Diabetes Mellitus	Drug: Teneligliptin 20mg|Drug: Placebo	Phase 3	2018	2016	2018
Teneligliptin	NCT02924064	Efficacy and Safety of Teneligliptin in Combination With Metformin in Chinese Patients With Type 2 Diabetes Mellitus	Completed	No Results Available	Type 2 Diabetes Mellitus	Drug: Teneligliptin 20mg|Drug: Placebo|Drug: Metformin ≥ 1000 mg	Phase 3	2018	2016	2018
Teneligliptin	NCT03011177	Teneligliptin Versus Linagliptin in Diabetes Mellitus Type Two Patients	Completed	No Results Available	Type2 Diabetes Mellitus	Drug: Teneligliptin|Drug: Linagliptin	Phase 4	2018	2017	2019
Tirzepatide	NCT03322631	A Study of Tirzepatide (LY3298176) in Japanese Participants With Type 2 Diabetes	Completed	No Results Available	Type 2 Diabetes Mellitus	Drug: Tirzepatide|Drug: Placebo	Phase 1	2018	2017	2019
Tirzepatide	NCT03311724	A Study of Tirzepatide (LY3298176) in Participants With Type 2 Diabetes	Completed	No Results Available	Type 2 Diabetes	Drug: Tirzepatide|Drug: Placebo	Phase 2	2018	2017	2019
Tirzepatide	NCT03131687	A Study of Tirzepatide (LY3298176) in Participants With Type 2 Diabetes Mellitus	Completed	Has Results	Type 2 Diabetes Mellitus	Drug: tirzepatide|Drug: Dulaglutide|Drug: Placebo	Phase 2	2018	2017	2019
Trelagliptin	NCT02512068	A Phase 3, Randomized, Double-blind, Parallel-group, Comparative Study and a Phase 3, Multicenter, Open-label, Long-term Study of SYR-472 (25 mg) in Patients With Type 2 Diabetes Mellitus Complicated by Severe Renal Impairment or End-stage Renal Disease	Completed	Has Results	Type 2 Diabetes Mellitus	Drug: Trelagliptin 25 mg|Drug: Placebo	Phase 3	2018	2015	2019
Trelagliptin	NCT03231709	Treatment Preference for Weekly Dipeptidyl Peptidase-4 (DPP-4) Inhibitors Versus Daily DPP-4 Inhibitors in Participants With Type 2 Diabetes Mellitus	Completed	Has Results	Type 2 Diabetes Mellitus	Drug: Trelagliptin|Drug: Alogliptin	Phase 4	2018	2017	2019
Vildagliptin	NCT03983551	Comparing the Renal Effect of Dipeptidyl-peptidase 4 Inhibitors and Sulfonylureas	Completed	No Results Available	Type 2 Diabetes Mellitus|Proteinuria	Drug: Dipeptidyl Peptidase 4 Inhibitor|Drug: Sulfonylurea	Phase 4	2018	2016	2019
Vildagliptin	NCT02803892	Monotherapy With Rapamycin in Long-standing Type 1 Diabetes	Completed	No Results Available	Diabetes Mellitus, Type 1	Drug: rapamycin|Drug: Vildagliptin|Drug: Placebo 1|Drug: Placebo 2	Phase 2	2018	2016	2020
XEN-D0501	NCT03278158	A Single-dose Trial to Investigate the Safety and Tolerability of XEN-D0501 in Patients With Diabetes Mellitus Type 2	Completed	No Results Available	Diabetes Mellitus, Type 2	Drug: Placebo|Drug: XEN-D0501, 1 mg/tablet|Drug: XEN-D0501, 2 mg/tablet|Drug: XEN-D0501, 4 mg/tablet|Drug: XEN-D0501, 8 mg/tablet	Phase 2	2018	2017	2019
ZGN-1061	NCT03254368	Study to Assess the Effects and Safety of ZGN-1061 in Overweight and Obese Participants With Type 2 Diabetes	Completed	No Results Available	Type 2 Diabetes Mellitus|Overweight and Obesity	Drug: ZGN-1061|Drug: Placebo	Phase 2	2018	2017	2019
BAY81-9783	NCT04065581	Bioequivalence Study for Acarbose/Metformin FDC	Completed	No Results Available	Diabetes Mellitus, Type 2	Drug: Acarbose/Metformin FDC(BAY81-9783)|Drug: Glucobay|Drug: Glucophage	Phase 1	2019	2019	2020
Bexagliflozin	NCT02558296	Bexagliflozin Efficacy and Safety Trial (BEST)	Active, not recruiting	No Results Available	Type 2 Diabetes Mellitus	Drug: Bexagliflozin|Drug: Placebo	Phase 3	2019	2015	2019
Bexagliflozin	NCT02769481	Safety and Efficacy of Bexagliflozin Compared to Glimepiride as Add-on Therapy to Metformin in Type 2 Diabetes Subjects	Completed	No Results Available	Type 2 Diabetes Mellitus	Drug: Bexagliflozin|Drug: Placebo for Bexagliflozin|Drug: Glimepiride|Drug: Placebo for Glimepiride	Phase 3	2019	2016	2019
Bexagliflozin	NCT03259789	Safety and Efficacy of Bexagliflozin Compared to Placebo as Add-on Therapy to Metformin in Type 2 Diabetes Subjects	Completed	No Results Available	Type2 Diabetes Mellitus	Drug: Bexagliflozin tablets, 20 mg|Drug: Bexagliflozin tablets, placebo	Phase 3	2019	2017	2019
CKD-370	NCT03849495	Pharmacokinetics and Safety/Tolerability After Oral Administration of CKD-370 and D745 in Healthy Adults	Unknown status	No Results Available	Type 2 Diabetes Mellitus	Drug: CKD-370|Drug: D745	Phase 1	2019	2019	2019
CKD-375	NCT03848637	The Clinical Trial to Investigate the Pharmacokinetics and Safety/Tolerability of CKD-375	Not yet recruiting	No Results Available	Type 2 Diabetes Mellitus	Drug: CKD-375|Drug: D387	Phase 1	2019	2019	2019
CKD-386	NCT03920579	A Clinical Trial to Investigate the Pharmacokinetics and Safety/Tolerability of CKD-386 in Healthy Male Volunteers	Recruiting	No Results Available	Hypertension|Dyslipidemias	Drug: CKD-386 formulation 1|Drug: CKD-386 formulation 2|Drug: D326, D337 and D013	Phase 1	2019	2019	2019
CKD-387	NCT04156685	Pharmacokinetics, Safety and Tolerability of CKD-387 10/500mg BE Phase1	Completed	No Results Available	Type2 Diabetes Mellitus	Drug: Part A, Reference (D635 10/500mg, Astrazeneca)|Drug: Part B, Reference (D635 10/500mg, Astrazeneca)	Phase 1	2019	2019	2019
CKD-387	NCT03738449	The Clinical Trial to Investigate the Pharmacokinetics and Safety/Tolerability of CKD-387 Under Fed Condition	Completed	No Results Available	Type 2 Diabetes Mellitus	Drug: CKD-387|Drug: D484	Phase 1	2019	2019	2019
CKD-387	NCT03848637	The Clinical Trial to Investigate the Pharmacokinetics and Safety/Tolerability of CKD-375	Not yet recruiting	No Results Available	Type 2 Diabetes Mellitus	Drug: CKD-375|Drug: D387	Phase 1	2019	2019	2019
CKD-387	NCT03849261	Pharmacokinetics and Safety/Tolerability After Oral Administration of CKD-387 and D635 in Healthy Adults	Unknown status	No Results Available	Type2 Diabetes Mellitus	Drug: CKD-387|Drug: D635	Phase 1	2019	2019	2019
CKD-387	NCT03849339	Pharmacokinetics and Safety/Tolerability After Oral Administration of CKD-387 and D635 Under Fed Condition	Unknown status	No Results Available	Type 2 Diabetes Mellitus	Drug: CKD-387|Drug: D635	Phase 1	2019	2019	2019
Dasiglucagon	NCT03688711	Trial to Confirm the Clinical Efficacy and Safety of Dasiglucagon in the Treatment of Hypoglycemia in Subjects With T1DM	Completed	No Results Available	Hypoglycemia|Diabetes Mellitus, Type 1	Drug: dasiglucagon|Drug: Placebo	Phase 3	2019	2018	2020
Dasiglucagon	NCT03840278	The Bihormonal iLet Bionic Pancreas Feasibility Study	Completed	Has Results	Type 1 Diabetes Mellitus	Device: Bihormonal iLet Bionic Pancreas|Device: Insulin-only Bionic Pancreas|Drug: Dasiglucagon	Phase 2|Phase 3	2019	2019	2019
Dasiglucagon	NCT03895697	A Trial to Compare the Efficacy and Safety of 2 Different Batches of Subcutaneous Dasiglucagon in Patients With T1DM	Completed	No Results Available	Hypoglycemia|Diabetes Mellitus, Type 1	Drug: dasiglucagon	Phase 3	2019	2019	2020
DBPR108	NCT04124484	DBPR108 Tablets in Type 2 Diabetes Mellitus Patients	Completed	No Results Available	Type 2 Diabetes Mellitus	Drug: DBPR108 tablet(50mg), Placebo matching DBPR108 tablet(100mg)|Drug: DBPR108 tablet(100mg), Placebo matching DBPR108 tablet(50mg), Placebo matching DBPR108 tablet(100mg)|Drug: DBPR108 tablet(100mg), Placebo matching DBPR108 tablet(50mg)|Drug: Placebo matching DBPR108 tablet(100mg), Placebo matching DBPR108 tablet(50mg)	Phase 2	2019	2017	2019
DM-199	NCT03795389	A Study to Asses Pharmacokinetics, Safety, and Tolerability of DM199 in Patients With Diabetes Mellitus and Chronic Kidney Disease	Completed	No Results Available	Chronic Kidney Disease|Chronic Kidney Disease, Stage 3 (Moderate)|Chronic Kidney Disease, Stage 4 (Severe)|Diabetes	Drug: DM199	Phase 1	2019	2019	2019
Evogliptin	NCT03667300	Effect of Evogliptin on Albuminuria in Patients With Type 2 Diabetes and Renal Insufficiency	Completed	No Results Available	Type2 Diabetes Mellitus|Albuminuria|Renal Insufficiency	Drug: Evogliptin|Drug: Linagliptin	Phase 2	2019	2017	2019
Evogliptin	NCT03766724	Pharmacokinetic and Pharmacodynamic Drug-Drug Interaction of Evogliptin and Empagliflozin or Dapagliflozin in Healthy Male Adults	Completed	No Results Available	Type2 Diabetes	Drug: Evogliptin→Evogliptin+Empagliflozin→Empagliflozin|Drug: Empagliflozin→Evogliptin→Evogliptin+Empagliflozin|Drug: Evogliptin→Evogliptin+Dapagliflozin→Dapagliflozin|Drug: Dapagliflozin→Evogliptin→Evogliptin+Dapagliflozin	Phase 1	2019	2018	2019
Evogliptin	NCT03939143	A Study to Investigate the Bioequivalence Test of DA-1229_01(A) at Fasting State	Completed	No Results Available	Type2 Diabetes	Drug: DA-1229_01(A), Sugamet SR Tab 5/1000mg®|Drug: Sugamet SR Tab 5/1000mg®, DA-1229_01(A)	Phase 1	2019	2019	2020
Gemigliptin	NCT04705506	Gemigliptin and Biomarkers of Kidney Injury and Vascular Calcification	Completed	No Results Available	Diabetic Nephropathies	Drug: Gemigliptin	Not Applicable	2019	2017	2021
Gemigliptin	NCT03864432	An Ascending Dose, Single/Multiple Dosing, Food Effect Clinical Trial to Evaluate Pharmacokinetics, Safety and Tolerability in Healthy Subjects After Oral Administration of Gemigliptin (Phase I)	Completed	No Results Available	Type 2 Diabetes Mellitus	Drug: Gemigliptin 25mg|Drug: Gemigliptin 50mg|Drug: Gemigliptin 100mg|Drug: Gemiglptin 50mg multiple dose	Phase 1	2019	2019	2020
Gemigliptin	NCT04070794	Food-effect Bioavailability of Fixed Dose Combination Zemimet® SR Tab. 50/1000 mg Under Fed and Fasting Conditions	Not yet recruiting	No Results Available	Type2 Diabetes	Drug: Gemigliptin/Metformin Hydrochloride Sustained Release 50/1000 mg(Fasting)|Drug: Gemigliptin/Metformin Hydrochloride Sustained Release 50/1000 mg(Fed)	Phase 1	2019	2019	2019
Gemigliptin	NCT04050098	Bioequivalence Study for Gemigliptin/Metformin 50/1000 mg and Coadministration of Gemigliptin 50 mg and Metformin 1000 mg.	Not yet recruiting	No Results Available	Type2 Diabetes	Drug: gemigliptin 50 mg and metformin hydrochloride 1000 mg prolonged release|Drug: Gemigliptin tartrate sesquihydrate and metformin	Phase 1	2019	2019	2019
Gemigliptin	NCT03867942	BE Study of Bilayer Combination of Gemigliptin/Rosuvastatin 50/20mg in Comparison to Monolayer Combination.	Not yet recruiting	No Results Available	Diabetes Mellitus, Type 2|Dyslipidemias	Drug: Monolayer group|Drug: Bilayer group	Phase 1	2019	2019	2019
GK1-399	NCT03335371	Evaluation of TTP399 in Patients With Type 1 Diabetes	Completed	No Results Available	Diabetes Mellitus, Type 1	Drug: TTP399|Drug: Placebo Oral Tablet	Phase 1|Phase 2	2019	2017	2020
HM12460A	NCT03332836	Multiple Ascending Dose Study of HM12460A in Type 2 Diabetes Mellitus	Suspended	No Results Available	Type 2 Diabetes Mellitus	Biological: HM12460A	Phase 1	2019	2017	2020
HMS-5552	NCT04324424	A Clinical Study to Access the Pharmacokinetics of HMS5552 in Renal Impaired Subjects and Healthy Volunteers	Completed	No Results Available	Type 2 Diabetes Mellitus	Drug: HMS5552	Phase 1	2019	2019	2020
HMS-5552	NCT03790839	Drug Interaction Study Between Dorzagliatin and Sitagliptin	Completed	No Results Available	Patients	Drug: Sitagliptin|Drug: Dorzagliatin	Phase 1	2019	2019	2019
HTI2088	NCT03848793	A Phase 2 Study to Evaluate the Efficacy and Safety of HS-20004 in Type 2 Diabetes Subjects.	Unknown status	No Results Available	Diabetes Mellitus, Type 2	Drug: HS-20004	Phase 2	2019	2019	2019
Insulin Tregopil	NCT03430856	Comparison of Insulin Tregopil (IN-105) With Insulin Aspart in Type 2 Diabetes Mellitus Patients	Completed	Has Results	Type2 Diabetes Mellitus	Drug: Insulin Tregopil|Drug: Insulin Aspart	Phase 2|Phase 3	2019	2017	2020
ISIS-703802	NCT03371355	Study of ISIS 703802 in Participants With Hypertriglyceridemia, Type 2 Diabetes Mellitus, and Nonalcoholic Fatty Liver Disease	Completed	Has Results	NAFLD|Diabetes Mellitus, Type 2|Hypertriglyceridemia|Fatty Liver, Nonalcoholic	Drug: Placebo|Drug: ISIS 703802 40 mg|Drug: ISIS 703802 80 mg|Drug: ISIS 703802 20 mg	Phase 2	2019	2017	2021
ISIS-703802	NCT03514420	Study of AKCEA-ANGPTL3-LRX (ISIS 703802) in Patients With With Familial Partial Lipodystrophy (FPL)	Completed	No Results Available	Familial Partial Lipodystrophy	Drug: AKCEA-ANGPTL3-LRX	Phase 2	2019	2018	2019
JNJ-64565111	NCT03586830	A Study to Evaluate the Safety and Efficacy of JNJ-64565111 in Severely Obese Participants With Type 2 Diabetes Mellitus	Completed	Has Results	Obesity and Diabetes Mellitus, Type 2	Drug: JNJ-64565111 Dose Level 1|Drug: JNJ-64565111 Dose Level 2|Drug: JNJ-64565111 Dose Level 3|Drug: Placebo	Phase 2	2019	2018	2020
KBP-089	NCT03907202	A Clinical Study to Evaluate the Safety, Tolerability, PK, PD, and Efficacy of KBP-089 in Patients With T2DM	Terminated	No Results Available	Type II Diabetes Mellitus	Drug: Daily injection of KBP/placebo for up to 28 days	Phase 1	2019	2018	2020
LY3209590	NCT03603704	A Study of LY3209590 in Japanese Participants With Type 2 Diabetes	Completed	No Results Available	Diabetes Mellitus, Type 2	Drug: LY3209590|Drug: Placebo	Phase 1	2019	2018	2020
MEDI0382	NCT03645421	Safety and Tolerability Study of MEDI0382 in Japanese Preobese or Obese Subjects With Type 2 Diabetes	Completed	Has Results	Type 2 Diabetes	Drug: MEDI0382 100 μg|Drug: MEDI0382 200 μg|Drug: MEDI0382 300 μg|Drug: PlaceboA|Drug: MEDI0382 50 ug|Drug: PlaceboB	Phase 2	2019	2018	2019
MEDI0382	NCT03596177	A Study to Evaluate the Effect of MEDI0382 on Energy Balance in Overweight and Obese Participants With Type 2 Diabetes Mellitus	Completed	Has Results	Diabetes Mellitus, Type II|Obesity	Drug: MEDI0382|Drug: Placebo	Phase 2	2019	2018	2021
MEDI0382	NCT03550378	A Study to Look at the Effect MEDI0382 Has on Blood Sugar in People With Type 2 Diabetes and Kidney Problems and Also to Check That MEDI0382 is Well Tolerated	Completed	Has Results	Type II Diabetes Mellitus|Renal Insufficiency	Drug: MEDI0382|Drug: Placebo	Phase 2	2019	2018	2020
MEDI0382	NCT03745937	A Study to Evaluate the Safety and Tolerability of MEDI0382 in Overweight and Obese Participants With Type 2 Diabetes Mellitus	Completed	Has Results	Type 2 Diabetes Mellitus	Drug: MEDI0382|Drug: Placebo	Phase 2	2019	2019	2020
MLR-1023	NCT03279263	An Add-on Study of MLR-1023 in Adults With Uncontrolled Type 2 Diabetes on Metformin Therapy	Unknown status	No Results Available	Type 2 Diabetes Mellitus	Drug: MLR-1023|Other: Placebo	Phase 2	2019	2017	2019
PAZ320	NCT03655535	Multicenter Study to Evaluate the Effect of BTI320 on Glycemic Control in Type 2 Diabetes	Completed	No Results Available	Type2 Diabetes Mellitus	Drug: BTI320|Other: Placebo	Phase 2	2019	2018	2020
PB-119	NCT03520972	Dose-finding of PB-119 Administered Subcutaneously Once-weekly Versus Placebo in Drug-naïve T2DM Subjects	Completed	No Results Available	Type 2 Diabetes Mellitus	Drug: PB-119 75ug|Drug: PB-119 150ug|Drug: PB-119 200ug|Drug: placebo	Phase 2	2019	2018	2020
PB-119	NCT03604419	Dose-finding of PB-119 Administered Subcutaneously Once Weekly Versus Placebo in Subjects With Type 2 Diabetes	Completed	No Results Available	Type 2 Diabetes Mellitus (T2DM)	Drug: PB-119 100 μg+ Glucophage®|Drug: PB-119 150 μg+ Glucophage®|Drug: PB-119 200 μg+ Glucophage®|Drug: PB-119 placebo + Glucophage®	Phase 2	2019	2018	2020
PF-06882961	NCT03538743	4-Week, Multiple-dose, Dose-escalating Study In Patients With Type 2 Diabetes	Completed	Has Results	Type 2 Diabetes Mellitus	Drug: Placebo|Drug: PF-06882961	Phase 1	2019	2018	2020
PXL770	NCT03886103	Pharmacokinetics and Metabolism of (14C)-Labelled PXL770	Completed	No Results Available	Healthy	Drug: 14C labeled PXL770	Phase 1	2019	2019	2019
RG 7992	NCT03060538	A Multiple Ascending Dose Study to Evaluate Safety and Tolerability of BFKB8488A in Participants With Type 2 Diabetes Mellitus and Participants With Non-Alcoholic Fatty Liver Disease	Completed	No Results Available	Diabetes Mellitus, Type 2|Non-Alcoholic Fatty Liver Disease	Drug: BFKB8488A|Other: Placebo	Phase 1	2019	2017	2020
Sotagliflozin	NCT03386344	Efficacy and Bone Safety of Sotagliflozin Dose 1 and Dose 2 Versus Placebo in Subjects With Type 2 Diabetes Mellitus Who Have Inadequate Glycemic Control	Active, not recruiting	No Results Available	Type 2 Diabetes Mellitus	Drug: Sotagliflozin (SAR439954)|Drug: Placebo	Phase 3	2019	2018	2020
Sotagliflozin	NCT02926937	Efficacy and Safety of Sotagliflozin Versus Placebo in Patients With Type 2 Diabetes Mellitus Not Currently Treated With Antidiabetic Therapy	Completed	No Results Available	Type 2 Diabetes Mellitus	Drug: Sotagliflozin (SAR439954)|Drug: Placebo	Phase 3	2019	2016	2020
Sotagliflozin	NCT02926950	Efficacy and Safety of Sotagliflozin Versus Placebo in Patients With Type 2 Diabetes Mellitus on Background of Metformin	Completed	No Results Available	Type 2 Diabetes Mellitus	Drug: Sotagliflozin (SAR439954)|Drug: Placebo|Drug: Metformin	Phase 3	2019	2016	2020
Sotagliflozin	NCT03332771	Efficacy and Safety of Sotagliflozin Versus Glimepiride and Placebo in Subjects With Type 2 Diabetes Mellitus That Are Taking Metformin Monotherapy	Completed	No Results Available	Type 2 Diabetes Mellitus	Drug: sotagliflozin (SAR439954)|Drug: glimepiride|Drug: metformin|Drug: placebo	Phase 3	2019	2017	2020
Sotagliflozin	NCT03285594	Efficacy and Safety of Sotagliflozin Versus Placebo in Participants With Type 2 Diabetes Mellitus Who Have Inadequate Glycemic Control While Taking Insulin Alone or With Other Oral Antidiabetic Agents	Completed	No Results Available	Type 2 Diabetes Mellitus	Drug: Sotagliflozin|Drug: Insulin glargine (HOE901)|Drug: Placebo	Phase 3	2019	2017	2020
Sotagliflozin	NCT03242018	A Study to Evaluate Safety and Effects of Sotagliflozin Dose 1 and Dose 2 on Glucose Control in Patients With Type 2 Diabetes, Severe Impairment of Kidney Function and Inadequate Blood Sugar Control	Completed	No Results Available	Type 2 Diabetes Mellitus|Chronic Kidney Disease Stage 4	Drug: Placebo|Drug: Sotagliflozin (SAR439954)	Phase 3	2019	2017	2020
Sotagliflozin	NCT03242252	Safety and Efficacy Study of Sotagliflozin on Glucose Control in Patients With Type 2 Diabetes, Moderate Impairment of Kidney Function, and Inadequate Blood Sugar Control	Completed	No Results Available	Type2 Diabetes Mellitus|Chronic Kidney Disease Stage 3	Drug: Placebo|Drug: Sotagliflozin (SAR439954)	Phase 3	2019	2017	2020
Sotagliflozin	NCT03066830	Efficacy and Safety of Sotagliflozin Versus Placebo in Patients With Type 2 Diabetes Mellitus on Background of Sulfonylurea Alone or With Metformin	Completed	No Results Available	Type 2 Diabetes Mellitus	Drug: Sotagliflozin (SAR439954)|Drug: placebo|Drug: Metformin|Drug: Sulfonylurea	Phase 3	2019	2017	2020
Sotagliflozin	NCT03351478	Efficacy and Safety of Sotagliflozin Versus Placebo and Empagliflozin in Subjects With Type 2 Diabetes Mellitus Who Have Inadequate Glycemic Control While Taking a DPP4 Inhibitor Alone or With Metformin	Completed	No Results Available	Type 2 Diabetes Mellitus	Drug: Sotagliflozin (SAR439954)|Drug: Empagliflozin|Drug: Placebo	Phase 3	2019	2017	2020
Sotagliflozin	NCT03462069	Comparison of Pharmacodynamic Effects of Sotagliflozin and Empagliflozin in T2DM Patients With Mild to Moderate Hypertension	Completed	No Results Available	Diabetes Mellitus	Drug: Sotagliflozin (SAR439954)|Drug: Placebo|Drug: Empagliflozin	Phase 2	2019	2018	2019
Sotagliflozin	NCT03802487	Study To Determine Bioavailability of Sotagliflozin in Healthy Male and Female Subjects	Completed	No Results Available	Type 2 Diabetes Mellitus|Healthy Subjects	Drug: Sotagliflozin (SAR439954)|Drug: 14C-microtracer|Drug: Charcoal	Phase 1	2019	2019	2019
Sotagliflozin	NCT03776227	A Bioequivalence Study Testing Two Formulations of Sotagliflozin in Healthy Male and Female Subjects Under Fasted Conditions	Completed	No Results Available	Type 2 Diabetes Mellitus|Healthy Subjects	Drug: sotagliflozin (SAR439954)	Phase 1	2019	2019	2019
Sotagliflozin	NCT03909451	Sotagliflozin Multiple-dose Study in Healthy Chinese Subjects	Completed	No Results Available	Diabetes Mellitus	Drug: Sotagliflozin (SAR439954)|Drug: Placebo	Phase 1	2019	2019	2019
Supaglutide	NCT03745885	A Study of the Efficacy and Safety of Supaglutide in Healthy Participants	Active, not recruiting	No Results Available	Diabetes Mellitus, Type 2	Drug: Supaglutide injection|Drug: Placebo	Phase 1	2019	2018	2020
SY-004	NCT03414892	Multiple Ascending Doses of Globalagliatin Hydrochloride in Type 2 Diabetes Mellitus	Completed	No Results Available	Hyperglycaemia (Diabetic)|Type 2 Diabetes Mellitus	Drug: Globalagliatin Hydrochloride|Drug: Placebo	Phase 1	2019	2018	2020
SY-009	NCT04119947	Single Ascending Oral Doses of SY-009 in Healthy Subjects	Completed	No Results Available	Diabetes	Drug: SY-009	Phase 1	2019	2019	2019
Teneligliptin	NCT03508323	Tenelia Elderly CGMS Study(TEDDY)	Active, not recruiting	No Results Available	Type 2 Diabetes Mellitus	Drug: Teneligliptin|Drug: Placebo	Phase 4	2019	2018	2020
Teneligliptin	NCT03769870	Teneligliptin and Atorvastatin DDI Study	Completed	No Results Available	Diabete Mellitus	Drug: Teneligliptin 20mg/day|Drug: Atorvastatin 40mg/Day|Drug: Teneligliptin 20mg/day + Atorvastatin 40mg/day	Phase 1	2019	2019	2019
Vildagliptin	NCT03693560	Effect of Adding Vildagliptin vs Glimepiride to Metformin on Inflammation's Markers in Type-2 Diabetic Patients With CAD	Completed	No Results Available	Coronary Artery Disease|Diabetes Mellitus, Type 2	Drug: Vildagliptin 50 mg Oral Tablet|Drug: Metformin 1000 mg Oral Tablet|Drug: Glimepiride upto 4 mg Oral Tablet	Phase 4	2019	2018	2020
Vildagliptin	NCT04654676	DPP4 Inhibitor on Glycemic Variability	Completed	No Results Available	Diabetes Mellitus, Type 2	Drug: Vildagliptin	Phase 4	2019	2018	2020
Vildagliptin	NCT03563794	Efficacy and Safety of Vildagliptin Added to Continuous Subcutaneous Insulin Infusion in Uncontrolled Type 2 Diabetes	Unknown status	No Results Available	T2DM	Drug: CSII+Vildagliptin|Drug: CSII(insulin Lispro)	Phase 4	2019	2018	2018
YG1699	NCT03953092	A Randomized, Double-blind, Placebo-controlled, Sequential Single and Multiple Ascending Doses of YG1699	Completed	No Results Available	Diabete Mellitus	Drug: YG1699|Drug: Placebos	Phase 1	2019	2019	2021
Cabergoline	NCT03313661	Co-administration of Cabergoline and Gliclazide Improve Glycemic Parameters and Lipid Profile in T2DM Patients	Unknown status	No Results Available	Diabetes	Drug: Cabergoline|Drug: Gliclazide	Phase 3	2020	2017	2018
CKD-375	NCT04221360	A Clinical Study to Evaluate the Pharmacokinetics, Safety and Tolerability of CKD-375	Not yet recruiting	No Results Available	Type2 Diabetes Mellitus	Drug: CKD-375|Drug: D390	Phase 1	2020	2020	2020
CKD-386	NCT04223895	A Clinical Trial to Investigate the Pharmacokinetics and Safety/Tolerability of CKD-386 in Healthy Adult Volunteers	Not yet recruiting	No Results Available	Type2 Diabetes Mellitus	Drug: CKD-386 Formulation 1|Drug: CKD-386 Formulation 2|Drug: D012, D326 and D337	Phase 1	2020	2020	2020
CKD-386	NCT04312698	Clinical Trial to Evaluate the Efficacy and Safety of CKD-386	Recruiting	No Results Available	Dyslipidemia Patients With Hypertension	Drug: D013, D326, D337|Drug: placebo of D013, D326, D337|Drug: D013, placebo of D326, placebo of D337	Phase 3	2020	2019	2020
CKD389	NCT04322032	Clinical Study to Evaluate the Pharmacokinetic Profiles and Safety of CKD-389	Not yet recruiting	No Results Available	Type 2 Diabetes	Drug: Reference drug|Drug: Test drug	Phase 1	2020	2020	2020
CKD-393	NCT04431687	A Clinical Trial to Investigate the Pharmacokinetic Drug Interaction and Safety of CKD-501, D759 and D150 (CKD-393)	Completed	No Results Available	Type 2 Diabetes Mellitus	Drug: CKD 501|Drug: D759, D150|Drug: CKD-501, D759, D150	Phase 1	2020	2020	2020
CKD-393	NCT04260438	Clinical Study to Evaluate the Pharmacokinetics, Safety and Tolerability of CKD-393 in Healthy Subjects	Not yet recruiting	No Results Available	Diabetes Mellitus, Type 2	Drug: CKD-501 0.5mg Tab. 1T, D759 100mg Tab. 1T and D150 1000mg Tab. 1T|Drug: CKD-393 0.5/100/1000mg formulation 1 Tab. 1T|Drug: CKD-393 0.5/100/1000mg formulation 2 Tab. 1T	Phase 1	2020	2020	2020
CKD-396	NCT04246190	A Clinical Study to Evaluate the Pharmacokinetics and Safety of CKD-396	Not yet recruiting	No Results Available	Type2 Diabetes Mellitus	Drug: CKD-501 and D759|Drug: CKD-396	Phase 1	2020	2020	2020
DA-1241	NCT03646721	A Study to Evaluate the Safety, Tolerability, PK and PD of DA-1241 in Healthy Male Subjects and Subjects With T2DM	Completed	No Results Available	Diabetes Mellitus, Type 2	Drug: DA-1241|Drug: Placebo|Drug: Sitagliptin	Phase 1	2020	2018	2021
Donepezil	NCT04507438	The Effect of Donepezil on Glycemic Control in Type II Diabetics	Recruiting	No Results Available	Diabetes Mellitus, Type 2	Drug: Donepezil 5-10 Mg Oral Tablet|Drug: Placebo Oral Tablet	Phase 2	2020	2019	2020
DWP16001	NCT04221399	Type 2 Diabetes Patients With Renal Impairment	Not yet recruiting	No Results Available	Type2 Diabetes	Drug: DWP16001	Phase 1	2020	2020	2020
DWP16001	NCT04014023	Study to Evaluate the Efficacy and Safety of DWP16001 in Patients With Type 2 Diabetes Mellitus	Recruiting	No Results Available	T2DM (Type 2 Diabetes Mellitus)	Drug: DWP16001|Drug: Placebo	Phase 2	2020	2019	2019
Efpeglenatide	NCT03353350	Efficacy and Safety of Efpeglenatide Versus Placebo in Patients With Type 2 Diabetes Mellitus Inadequately Controlled With Diet and Exercise	Completed	No Results Available	Type 2 Diabetes Mellitus	Drug: efpeglenatide (SAR439977)|Drug: placebo	Phase 3	2020	2017	2021
Efpeglenatide	NCT03684642	Efficacy and Safety of Efpeglenatide Versus Dulaglutide in Patients With Type 2 Diabetes Mellitus Inadequately Controlled With Metformin	Terminated	No Results Available	Type 2 Diabetes Mellitus	Drug: Efpeglenatide SAR439977|Drug: Dulaglutide|Drug: Metformin	Phase 3	2020	2018	2020
Efpeglenatide	NCT03496298	Effect of Efpeglenatide on Cardiovascular Outcomes	Terminated	No Results Available	Type 2 Diabetes Mellitus	Drug: Efpeglenatide (SAR439977)|Drug: Placebo	Phase 3	2020	2018	2021
Efpeglenatide	NCT03770728	Efficacy and Safety of Efpeglenatide Versus Placebo in Patients With Type 2 Diabetes Mellitus Inadequately Controlled With Metformin Alone or in Combination With Sulfonylurea	Terminated	No Results Available	Type 2 Diabetes Mellitus	Drug: Efpeglenatide SAR439977|Drug: Placebo|Drug: Metformin|Drug: Sulfonylurea	Phase 3	2020	2019	2021
Evogliptin	NCT03910361	Efficacy and Safety of Evoglitin in Patients With Type 2 Diabetes and Non-alcoholic Fatty Liver Diseases	Enrolling by invitation	No Results Available	Type2 Diabetes|Non-Alcoholic Fatty Liver Disease	Drug: Evogliptin|Drug: Pioglitazone	Phase 4	2020	2019	2019
Gemigliptin	NCT02609815	Initial Combination of Gemigliptin and Metformin on Microbiota Change	Active, not recruiting	No Results Available	Diabetes	Drug: gemigliptin/metformin|Drug: glimepiride/metformin	Not Applicable	2020	2015	2020
Gemigliptin	NCT04317703	Bioequivalence Study for Fixed Dose Combination Zemimet® SR Tab. 50/1000 and Coadministration of Gemigliptin 50 mg and Metformin 1000 mg.	Completed	No Results Available	Type 2 Diabetes	Drug: Gemigliptin tartrate sesquihydrate and metformin|Drug: gemigliptin 50 mg and metformin hydrochloride 1000 mg prolonged release	Phase 1	2020	2020	2021
HMS-5552	NCT03173391	Long-term Efficacy and Safety of HMS5552 in T2DM Subjects	Active, not recruiting	No Results Available	Diabetes Mellitus, Type 2	Drug: HMS5552|Drug: Placebo	Phase 3	2020	2017	2020
HMS-5552	NCT03790787	Drug Interaction Study Between Dorzagliatin and Empagliflozin	Completed	No Results Available	Patients	Drug: Empagliflozin|Drug: Dorzagliatin	Phase 1	2020	2019	2020
HMS-5552	NCT03141073	Long-term Efficacy and Safety of HMS5552 add-on to Metformin in T2DM Subjects	Recruiting	No Results Available	Diabetes Mellitus, Type 2	Drug: HMS5552|Drug: Placebo	Phase 3	2020	2017	2020
HMS-5552	NCT04426708	A Clinical Study to Access the Pharmacokinetics of HMS5552 in Hepatic Impaired Subjects and Healthy Volunteers	Recruiting	No Results Available	Type 2 Diabetes Mellitus	Drug: HMS5552	Phase 1	2020	2019	2020
HSK7653	NCT04540016	Mass Balance and Biotransformation of [14C]HSK7653 in Human	Recruiting	No Results Available	Type II Diabetes	Drug: [14C]HSK7653	Phase 1	2020	2020	2020
Ipragliflozin	NCT03076112	Efficacy of Ipragliflozin Compared With Sitagliptin in Uncontrolled Type 2 Diabetes With Sulfonylurea and Metformin	Recruiting	No Results Available	Type 2 Diabetes Mellitus	Drug: Ipragliflozin|Drug: Sitagliptin	Phase 3	2020	2017	2019
Janagliflozin	NCT03811548	Janagliflozin Treat T2DM Monotherapy	Recruiting	No Results Available	Diabetes Type 2	Drug: Janagliflozin 25mg|Drug: Janagliflozin 50mg|Drug: Placebo/Janagliflozin	Phase 3	2020	2019	2020
Janagliflozin	NCT03851432	Janagliflozin Treat Type 2 Diabetes Mellitus (T2DM) Inadequately Controlled With Metformin	Recruiting	No Results Available	Diabetes Mellitus, Type 2	Drug: Janagliflozin plus metformin|Device: Placebo plus metformin	Phase 3	2020	2019	2020
Lobeglitazone	NCT03739125	Efficacy and Safety of CKD-501 Added to D150 Plus D745 10mg Therapy in Patients With Type 2 Diabetes	Active, not recruiting	No Results Available	Type2 Diabetes	Drug: CKD-501 0.5mg|Drug: Placebo	Phase 3	2020	2017	2020
Lobeglitazone	NCT02338921	Triple Combination Therapy in Type 2 Diabetic Patients Who Had Inadequate Glycemic Control With Combination Therapy	Active, not recruiting	No Results Available	Type 2 Diabetes	Drug: Sitagliptin|Drug: Dapagliflozin|Drug: Lobeglitazone|Drug: Glimepirde|Drug: Metformin	Phase 4	2020	2015	2020
Lobeglitazone	NCT04334213	A Clinical Trial to Investigate the Pharmacokinetic Drug Interaction and Safety of CKD-501, D745 and D150	Completed	No Results Available	Type 2 Diabetes	Drug: CKD-501|Drug: D745, D150|Drug: CKD-501, D745, D150	Phase 1	2020	2020	2020
Lobeglitazone	NCT04431687	A Clinical Trial to Investigate the Pharmacokinetic Drug Interaction and Safety of CKD-501, D759 and D150 (CKD-393)	Completed	No Results Available	Type 2 Diabetes Mellitus	Drug: CKD 501|Drug: D759, D150|Drug: CKD-501, D759, D150	Phase 1	2020	2020	2020
Lobeglitazone	NCT04246190	A Clinical Study to Evaluate the Pharmacokinetics and Safety of CKD-396	Not yet recruiting	No Results Available	Type2 Diabetes Mellitus	Drug: CKD-501 and D759|Drug: CKD-396	Phase 1	2020	2020	2020
Lobeglitazone	NCT04260438	Clinical Study to Evaluate the Pharmacokinetics, Safety and Tolerability of CKD-393 in Healthy Subjects	Not yet recruiting	No Results Available	Diabetes Mellitus, Type 2	Drug: CKD-501 0.5mg Tab. 1T, D759 100mg Tab. 1T and D150 1000mg Tab. 1T|Drug: CKD-393 0.5/100/1000mg formulation 1 Tab. 1T|Drug: CKD-393 0.5/100/1000mg formulation 2 Tab. 1T	Phase 1	2020	2020	2020
Lobeglitazone	NCT03770052	Glucose-Lowering Effects and Safety of Adding 0.25 or 0.5 mg Duvie	Unknown status	No Results Available	Type 2 Diabetes Mellitus|Inadequate Glucose Control	Drug: duvie	Phase 4	2020	2018	2018
LY3209590	NCT03736785	A Study of LY3209590 in Participants With Type 2 Diabetes Mellitus	Completed	No Results Available	Type 2 Diabetes Mellitus	Drug: LY3209590|Drug: Insulin Degludec	Phase 2	2020	2018	2020
LY3209590	NCT04276428	A Study of LY3209590 in Japanese Participants With Type 2 Diabetes Mellitus	Completed	No Results Available	Diabetes Mellitus, Type 2	Drug: LY3209590|Drug: Insulin Degludec	Phase 1	2020	2020	2020
LY3437943	NCT04143802	A Study of LY3437943 in Participants With Type 2 Diabetes Mellitus (T2DM)	Completed	No Results Available	Diabetes Mellitus, Type 2	Drug: LY3437943|Drug: Dulaglutide|Drug: Placebo	Phase 1	2020	2019	2021
MEDI0382	NCT04208620	Safety and Tolerability Study of Cotadutide in Japanese Obese Subjects With Type 2 Diabetes Melitus	Completed	No Results Available	Type 2 Diabetes	Drug: Placebo|Drug: Cotadutide	Phase 1	2020	2020	2020
NNC0472-0147	NCT04262661	A Study to Look at How Safe NNC0472-0147 is in Healthy People and in People With Type 2 Diabetes	Completed	No Results Available	Healthy Volunteers|Diabetes Mellitus, Type 2	Drug: NNC0472-0147|Drug: insulin glargine|Drug: Placebo (NNC0472-0147)	Phase 1	2020	2020	2020
PXL770	NCT03763877	A Study of the Efficacy and Safety of PXL770 Versus Placebo After 12 Weeks of Treatment in Patients With NAFLD	Completed	No Results Available	Nonalcoholic Fatty Liver	Drug: PXL770|Drug: Placebo oral capsule	Phase 2	2020	2019	2020
REMD-477	NCT03919617	Metabolic Pathways of GRA in Patients With Type 1 Diabetes	Active, not recruiting	No Results Available	Type 1 Diabetes Mellitus	Drug: REMD-477	Phase 1|Phase 2	2020	2019	2020
SHR-3824	NCT04390295	Efficacy and Safety of SHR3824 in Combination With Metformin in Subjects With Type 2 Diabetes	Recruiting	No Results Available	Type 2 Diabetes Mellitus	Drug: Placebo|Drug: SHR3824|Drug: metformin	Phase 3	2020	2017	2020
Sotagliflozin	NCT03315143	Effect of Sotagliflozin on Cardiovascular and Renal Events in Patients With Type 2 Diabetes and Moderate Renal Impairment Who Are at Cardiovascular Risk	Terminated	No Results Available	Type 2 Diabetes Mellitus|Chronic Kidney Diseases	Drug: Sotagliflozin (SAR439954)|Drug: Placebo	Phase 3	2020	2017	2020
Sotagliflozin	NCT03521934	Effect of Sotagliflozin on Cardiovascular Events in Patients With Type 2 Diabetes Post Worsening Heart Failure (SOLOIST-WHF Trial)	Terminated	No Results Available	Heart Failure|Type 2 Diabetes Mellitus	Drug: Sotagliflozin (SAR439954)|Drug: Placebo	Phase 3	2020	2018	2020
Sotagliflozin	NCT03760965	Efficacy and Safety of Sotagliflozin Versus Placebo in Chinese Patients With Type 2 Diabetes Mellitus Not Adequately Controlled by Diet and Exercise	Terminated	No Results Available	Type 2 Diabetes Mellitus	Drug: sotagliflozin (SAR439954)|Drug: placebo	Phase 3	2020	2018	2020
Sotagliflozin	NCT03761134	Efficacy and Safety of Sotagliflozin Versus Placebo in Chinese Patients With Type 2 Diabetes Mellitus Not Adequately Controlled by Metformin With or Without Sulfonylurea	Terminated	No Results Available	Type 2 Diabetes Mellitus	Drug: sotagliflozin (SAR439954)|Drug: placebo|Drug: metformin|Drug: sulfonylurea	Phase 3	2020	2018	2020
Supaglutide	NCT04314622	A Study of Supaglutide in Chinese Type 2 Diabetes Patients	Recruiting	No Results Available	Diabetes Mellitus, Type 2	Drug: Supaglutide|Drug: Placebo	Phase 2	2020	2020	2020
SY-004	NCT04217291	The Efficacy and Safety of Different Doses of SY-004 in Patients With Type 2 Diabetes Mellitus	Recruiting	No Results Available	Type 2 Diabetes Mellitus	Drug: SY-004|Other: SY-004 matching placebo	Phase 2	2020	2019	2020
Teneligliptin	NCT04431141	Pharmacokinetic Drug Interaction Between Teneligliptin and Empagliflozin	Not yet recruiting	No Results Available	Type 2 Diabetes Mellitus	Drug: Teneligliptin|Drug: Empagliflozin|Drug: Teneligliptin and Empagliflozin	Phase 1	2020	2020	2020
Teneligliptin	NCT02449330	Teneligliptin on the Progressive Left Ventricular Diastolic Dysfunction With Type 2 Diabetes Mellitus Study	Recruiting	No Results Available	Diabetes Mellitus, Type 2	Drug: Teneligliptin	Phase 4	2020	2015	2018
Tirzepatide	NCT03882970	A Study of Tirzepatide (LY3298176) Versus Insulin Degludec in Participants With Type 2 Diabetes	Completed	No Results Available	Type 2 Diabetes Mellitus	Drug: Tirzepatide|Drug: Insulin Degludec	Phase 3	2020	2019	2021
Tirzepatide	NCT03954834	A Study of Tirzepatide (LY3298176) in Participants With Type 2 Diabetes Not Controlled With Diet and Exercise Alone	Completed	No Results Available	Type 2 Diabetes Mellitus	Drug: Tirzepatide|Drug: Placebo	Phase 3	2020	2019	2020
Tirzepatide	NCT04039503	A Study of Tirzepatide (LY3298176) Versus Placebo in Participants With Type 2 Diabetes Inadequately Controlled on Insulin Glargine With or Without Metformin	Completed	No Results Available	Type 2 Diabetes	Drug: Tirzepatide|Drug: Placebo	Phase 3	2020	2019	2021
TQ-F3083	NCT03986073	Study of TQ-F3083 Capsules in Subjects With Type 2 Diabetes Mellitus	Recruiting	No Results Available	Type 2 Diabetes Mellitus	Drug: TQ-F3083 capsule 10 mg|Drug: TQ-F3083 capsule 20 mg|Drug: TQ-F3083 blank analog capsule|Drug: Linagliptin blank analog tablet|Drug: Linagliptin tablet	Phase 2	2020	2020	2020
Trelagliptin	NCT03940183	Clinical Trial of Trelagliptin Succinate Tablets in the Treatment of Type 2 Diabetes	Completed	No Results Available	Diabetes Mellitus, Type 2	Drug: Trelagliptin Succinate|Drug: Placebo Oral Tablet	Phase 3	2020	2019	2021
Trelagliptin	NCT04374864	Dose Modification Requirement for Trelagliptin in Egyptian Population	Recruiting	No Results Available	Diabetes Mellitus	Drug: Trelagliptin	Phase 4	2020	2020	2020
Vildagliptin	NCT03804411	Prognostic Predictors of Response to Hypoglycemic Therapy	Recruiting	No Results Available	Diabetes Mellitus, Type 2	Drug: Automatic system guided treatment|Drug: Standard treatment	Phase 4	2020	2017	2020
Vildagliptin	NCT04485845	Metformin Versus Vildagliptin in Reducing Risk of Metabolic Syndrome Complications Progression	Recruiting	No Results Available	Metabolic Syndrome|Diabete Type 2|Kidney Insufficiency	Drug: Vildagliptin|Drug: Captopril Tablets|Drug: MetFORMIN 500 Mg Oral Tablet	Phase 4	2020	2019	2020
XW003	NCT04389775	To Evaluate the Safety, Tolerability, PK, and PD of XW003 Injection in Healthy Adult Participants	Recruiting	No Results Available	Type 2 Diabetes Mellitus|NASH - Nonalcoholic Steatohepatitis	Drug: XW003|Drug: Volume-matching Placebo	Phase 1	2020	2020	2020
Anakinra	NCT04227769	IL-1-receptor Antagonist During Cephalic Phase of Insulin Secretion in Health and Type 2 Diabetes	Recruiting	No Results Available	Diabetes Mellitus Type 2 in Obese|Inflammation|Metabolic Disease|Glucose Metabolism Disorders (Including Diabetes Mellitus)	Drug: Anakinra Prefilled Syringe	Phase 2	2021	2020	2020
Beinaglutide	NCT03987308	Comparing the Efficacy and Safety Between Short-term Continuous Subcutaneous Beinaglutide Injection and Continuous Subcutaneous Insulin Infusion (CSII) for Newly Diagnosed Type 2 Diabetes	Not yet recruiting	No Results Available	Type 2 Diabetic Patients	Drug: Beinaglutide|Drug: Insulin aspart	Not Applicable	2021	2019	2019
BI-456906	NCT04153929	A Study to Test Whether Different Doses of BI 456906 Are Effective in Treating Adults With Type 2 Diabetes.	Recruiting	No Results Available	Diabetes Mellitus, Type 2	Drug: BI 456906|Drug: Placebo|Drug: Semaglutide	Phase 2	2021	2020	2021
CKD-386	NCT04694989	A Clinical Trial to Evaluate the Tolerability and Pharmacokinetics of CKD-386(2)	Not yet recruiting	No Results Available	Hypertension and Dyslipidemia	Drug: CKD-386|Drug: D013, D326, D337	Phase 1	2021	2021	2021
CKD-386	NCT04673864	A Clinical Trial to Evaluate the Tolerability and Pharmacokinetics of CKD-386	Not yet recruiting	No Results Available	Hypertension and Dyslipidemia	Drug: CKD-386|Drug: D012, D326, D337	Phase 1	2021	2021	2020
CKD-393	NCT04706286	Clinical Trial to Investigate the Pharmacokinetics and Safety of CKD-393	Not yet recruiting	No Results Available	T2DM (Type 2 Diabetes Mellitus)	Drug: CKD-501, D759, D150|Drug: CKD-393 0.5/100/1000 mg	Phase 1	2021	2021	2021
Dasiglucagon	NCT04449692	Low-dose Dasiglucagon for Prevention of Insulin-Induced Hypoglycemia in People With Type 1 Diabetes	Completed	No Results Available	Type 1 Diabetes|Hypoglycemia	Drug: Dasiglucagon|Other: Carbohydrate (dextrose tablets)	Phase 2	2021	2020	2021
Dasiglucagon	NCT04192019	Micro Glucagon During Exercise in Type 1 Diabetes	Not yet recruiting	No Results Available	Type 1 Diabetes|Hypoglycemia	Drug: Micro-glucagon|Drug: Mini-glucagon	Early Phase 1	2021	2020	2019
DWP16001	NCT04632862	The Efficacy and Safety of DWP16001 Compared to Placebo in the Treatment of Type 2 Diabetes Mellitus.	Enrolling by invitation	No Results Available	T2DM (Type 2 Diabetes Mellitus)	Drug: DWP16001	Phase 3	2021	2020	2020
DWP16001	NCT04654390	The Efficacy Nad Safety of DWP16001 Compared to Active Drug in the Treatment of Type 2 Diabetes Mellitus	Not yet recruiting	No Results Available	T2DM (Type 2 Diabetes Mellitus)	Drug: DWP16001 Amg	Phase 3	2021	2020	2020
DWP16001	NCT04634500	The Efficacy and Safety of DWP16001 in Combination With Metformin in Patients With Type 2 Diabetes.	Recruiting	No Results Available	T2DM (Type 2 Diabetes Mellitus)	Drug: Dapagliflozin	Phase 3	2021	2020	2020
Efpeglenatide	NCT03713684	Efficacy and Safety of Efpeglenatide Versus Placebo in Patients With Type 2 Diabetes Mellitus Inadequately Controlled With Basal Insulin Alone or in Combination With Oral Antidiabetic Drug(s)	Terminated	No Results Available	Type 2 Diabetes Mellitus	Drug: Efpeglenatide SAR439977|Drug: Placebo|Drug: Insulin glargine	Phase 3	2021	2018	2021
Evogliptin	NCT04653779	A Clinical Trial to Evaluate the Preference Regarding Convenience of Medication and Efficacy/Safety of SUGAMET®XR Tablet 5/1000mg	Not yet recruiting	No Results Available	Diabetes Mellitus, Type 2|Renal Disease|Diabetes Mellitus|Metabolic Disease|Endocrine System Diseases	Drug: Evogliptin 5mg/Metformin 1000mg	Phase 4	2021	2020	2020
GABA and GAD-alum	NCT02002130	The Use of Glutamic Acid Decarboxylase (GAD) and Gamma-Amino Butyric Acid (GABA) in the Treatment of Type I Diabetes	Active, not recruiting	No Results Available	Type I Diabetes	Drug: Placebo GABA and Placebo GAD-alum|Drug: GABA and Placebo GAD-alum|Drug: Active Oral GABA and Active GAD-alum injection	Phase 1	2021	2015	2020
GSK2256294	NCT03486223	Soluble Epoxide Hydrolase Inhibition and Insulin Resistance	Recruiting	No Results Available	Diabetes Mellitus|Endocrine System Diseases|Glucose Metabolism Disorders|PreDiabetes|Obesity	Drug: GSK2256294|Drug: Placebo oral capsule|Genetic: Genotyping	Phase 2	2021	2018	2020
HMS-5552	NCT04091854	The Progress of Diabetes Mellitus After HMS5552 Treatment in Type 2 Diabetes Mellitus	Not yet recruiting	No Results Available	Type2 Diabetes Mellitus	Drug: HMS5552		2021	2019	2019
HSK7653	NCT04564872	HSK7653 Metformin Add-on Study in Patients With Type 2 Diabetes Mellitus	Recruiting	No Results Available	Diabetes Mellitus, Type 2	Drug: HSK7653 10 mg Q2W|Drug: HSK7653 25 mg Q2W|Drug: Linagliptin 5 mg QD	Phase 3	2021	2020	2020
Insulin icodec	NCT04582448	A Study Looking at How Insulin Icodec is Taken up in the Blood When Administered in Different Injection Sites in People With Type 2 Diabetes	Recruiting	No Results Available	Diabetes Mellitus, Type 2	Drug: Insulin icodec	Phase 1	2021	2020	2020
Insulin icodec	NCT04597697	A Study to Test How a New Long-acting Insulin (Insulin Icodec) Works in the Body of People With Liver Disease	Recruiting	No Results Available	Diabetes Mellitus, Type 2	Drug: Insulin icodec	Phase 1	2021	2020	2021
Insulin Tregopil	NCT04141423	Comparison of Pharmacokinetics , Safety, Tolerability and Pharmacodynamics of Biocon Insulin Tregopil and Insulin Aspart	Recruiting	No Results Available	Type 1 Diabetes Mellitus (T1DM)	Drug: Tregopil	Phase 1	2021	2019	2020
IVA-337	NCT03459079	Lanifibranor in Patients With Type 2 Diabetes & Nonalcoholic Fatty Liver Disease	Recruiting	No Results Available	Nonalcoholic Fatty Liver Disease (NAFLD)|Type 2 Diabetes (T2DM)	Drug: Lanifibranor|Other: Placebo	Phase 2	2021	2018	2021
JTT-662	NCT04465877	Study to Evaluate Safety, Tolerability, Pharmacokinetics & Pharmacodynamics of JTT-662 in Subjects With Type 2 Diabetes	Recruiting	No Results Available	Diabetes Mellitus, Type 2	Drug: JTT-662|Drug: Placebo	Phase 1	2021	2020	2020
Lobeglitazone	NCT03641352	The Efficacy and Safety of CKD-501 Added to D150 Plus D759 Therapy in Patients With Type 2 Diabetes	Recruiting	No Results Available	Type2 Diabetes	Drug: CKD-501 0.5mg|Drug: Placebo	Phase 3	2021	2018	2018
LY3209590	NCT04450394	A Phase 2 Study of LY3209590 in Participants With Type 2 Diabetes Mellitus	Recruiting	No Results Available	Type 2 Diabetes Mellitus	Drug: LY3209590|Drug: Insulin Degludec	Phase 2	2021	2020	2021
LY3209590	NCT04450407	A Study of LY3209590 in Participants With Type 1 Diabetes	Recruiting	No Results Available	Type 1 Diabetes Mellitus	Drug: LY3209590|Drug: Insulin Degludec	Phase 2	2021	2020	2021
LY3305677	NCT03928379	A Study of LY3305677 in Participants With Type 2 Diabetes	Recruiting	No Results Available	Diabetes Mellitus, Type 2	Drug: LY3305677|Drug: Placebo	Phase 1	2021	2019	2021
LY3493269	NCT04515576	A Study of LY3493269 in Participants With Type 2 Diabetes	Active, not recruiting	No Results Available	Diabetes Mellitus, Type 2	Drug: LY3493269|Drug: Dulaglutide|Drug: Placebo	Phase 1	2021	2020	2021
LY3502970	NCT04426474	A Study of LY3502970 in Participants With Type 2 Diabetes	Recruiting	No Results Available	Diabetes Mellitus, Type 2	Drug: LY3502970|Drug: Placebo	Phase 1	2021	2020	2021
MEDI0382	NCT03555994	A Study to Investigate the Effect of MEDI0382 on Hepatic Glycogen Metabolism in Overweight and Obese Subjects With Type 2 Diabetes Mellitus.	Recruiting	No Results Available	Type 2 Diabetes Mellitus	Drug: MEDI0382|Drug: Placebo|Drug: Liraglutide	Phase 2	2021	2018	2021
Mifepristone	NCT03052400	Efficacy of Mifepristone in Males With Type 2 Diabetes Mellitus	Recruiting	No Results Available	Type 2 Diabetes Mellitus|Insulin Resistance	Drug: Mifepristone 600 mg daily|Drug: Placebo	Phase 2	2021	2017	2020
PF-06835919	NCT03969719	A Double-blind Study to Assess 2 Doses of an Investigational Product for 16 Weeks in Participants With Non-alcoholic Fatty Liver Disease and Type 2 Diabetes Mellitus	Recruiting	No Results Available	Non-alcoholic Steatohepatitis	Drug: Placebo|Drug: PF-06835919	Phase 2	2021	2019	2021
PF-06882961	NCT03985293	A 16 Week Study to Evaluate the Efficacy and Safety of PF-06882961 in Adults With Type 2 Diabetes Mellitus	Recruiting	No Results Available	Diabetes Mellitus, Type 2	Drug: Placebo|Drug: PF-06882961	Phase 2	2021	2019	2021
PF-06882961	NCT04552470	A Study to Evaluate the Safety, Tolerability, Pharmacokinetics and Pharmacodynamics of PF-06882961 in Japanese Adults With Type 2 Diabetes Mellitus	Recruiting	No Results Available	Type 2 Diabetes Mellitus	Drug: Placebo|Drug: PF-06882961	Phase 1	2021	2020	2020
PF-06882961	NCT04617275	A 12-WEEK TITRATE STUDY TO EVALUATE SAFETY, TOLERABILITY AND PHARMACODYNAMICS OF PF-06882961 IN ADULTS WITH TYPE 2 DIABETES MELLITUS AND IN NON-DIABETIC ADULTS WITH OBESITY	Recruiting	No Results Available	Diabetes|Obesity	Drug: PF-06882961|Other: Placebo	Phase 2	2021	2021	2021
PF-07081532	NCT04305587	Multiple Escalating Oral Doses Study of PF-07081532 in Adult Participants With Type 2 Diabetes Mellitus	Recruiting	No Results Available	Diabetes Mellitus Type 2	Drug: PF-07081532|Other: Placebo|Drug: Clopidogrel	Phase 1	2021	2020	2020
REMD-477	NCT04545411	Combination GRA and SGLT-2i Treatment in Type 1 Diabetes	Not yet recruiting	No Results Available	Type 1 Diabetes	Drug: Dapagliflozin 10 MG [Farxiga]|Drug: REMD-477|Drug: Placebo	Phase 1|Phase 2	2021	2020	2020
REMD-477	NCT03117998	Multiple Dose Study to Evaluate the Efficacy, Safety and Pharmacodynamics of REMD-477 in Subjects With Type 1 Diabetes Mellitus	Recruiting	No Results Available	Type1 Diabetes Mellitus	Biological: REMD-477|Biological: Placebo Comparator	Phase 2	2021	2017	2020
SY-008	NCT04345120	Multiple Ascending Doses of SY-008 in Type 2 Diabetes Mellitus	Not yet recruiting	No Results Available	Type 2 Diabetes Mellitus	Drug: SY-008|Drug: SY-008 matching placebo	Phase 1	2021	2020	2020
SY-009	NCT04345107	Multiple Ascending Doses of SY-009 in Type 2 Diabetes Mellitus	Not yet recruiting	No Results Available	Type 2 Diabetes Mellitus	Drug: SY-009|Drug: SY-009 matching placebo	Phase 1	2021	2020	2020
Teneligliptin	NCT04446026	A Randomized, Placebo-controlled Clinical Trial of Teneligliptin as Quadruple Oral Combination Therapy for Type 2 DM After Failure of an Oral Triple Anti-diabetic Regimen	Recruiting	No Results Available	Type 2 Diabetes Mellitus	Drug: teneligliptin|Drug: Placebo	Phase 4	2021	2020	2020
Tirzepatide	NCT03730662	A Study of Tirzepatide (LY3298176) Once a Week Versus Insulin Glargine Once a Day in Participants With Type 2 Diabetes and Increased Cardiovascular Risk	Active, not recruiting	No Results Available	Type 2 Diabetes Mellitus	Drug: Tirzepatide|Drug: Insulin Glargine	Phase 3	2021	2018	2021
Tirzepatide	NCT03861052	A Study of Tirzepatide (LY3298176) Compared to Dulaglutide in Participants With Type 2 Diabetes	Active, not recruiting	No Results Available	Type 2 Diabetes	Drug: Tirzepatide|Drug: Dulaglutide	Phase 3	2021	2019	2021
Tirzepatide	NCT04093752	A Study of Tirzepatide (LY3298176) in Participants With Type 2 Diabetes on Metformin With or Without Sulfonylurea (SURPASS-AP-Combo)	Active, not recruiting	No Results Available	Type 2 Diabetes	Drug: Tirzepatide|Drug: Insulin Glargine	Phase 3	2021	2019	2021
Tirzepatide	NCT03951753	A Study of Tirzepatide in Participants With Type 2 Diabetes Mellitus (T2DM)	Active, not recruiting	No Results Available	Diabetes Mellitus, Type 2	Drug: Tirzepatide|Drug: Semaglutide|Drug: Placebo	Phase 1	2021	2019	2020
Tirzepatide	NCT03861039	A Long-term Safety Study of Tirzepatide (LY3298176) in Participants With Type 2 Diabetes	Active, not recruiting	No Results Available	Type 2 Diabetes Mellitus	Drug: Tirzepatide	Phase 3	2021	2019	2021
Tirzepatide	NCT03987919	A Study of Tirzepatide (LY3298176) Versus Semaglutide Once Weekly as Add-on Therapy to Metformin in Participants With Type 2 Diabetes	Active, not recruiting	No Results Available	Type 2 Diabetes	Drug: Tirzepatide|Drug: Semaglutide	Phase 3	2021	2019	2021
Tirzepatide	NCT04407234	A Study to Measure Stomach Emptying in Overweight Non-diabetic and Diabetic Participants Using Tirzepatide	Completed	No Results Available	Overweight|Obesity|Diabetes Mellitus, Type 2	Drug: Tirzepatide|Drug: Acetaminophen	Phase 1	2021	2020	2021
Tirzepatide	NCT04235959	A Study of Tirzepatide in Chinese Participants With Type 2 Diabetes Mellitus	Recruiting	No Results Available	Diabetes Mellitus, Type 2	Drug: Tirzepatide|Drug: Placebo	Phase 1	2021	2020	2021
Tirzepatide	NCT04050553	A Study of Tirzepatide in Participants With Type 2 Diabetes Mellitus	Recruiting	No Results Available	Diabetes Mellitus, Type 2|Hypoglycemia	Drug: Tirzepatide|Drug: Placebo	Phase 1	2021	2020	2020
Vildagliptin	NCT02849899	Prevention of Diabetes After Transplantation by Vildagliptin in the Early Post-transplant Period	Recruiting	No Results Available	Disorder Related to Renal Transplantation|Diabetes	Drug: Vildagliptin|Drug: Placebo	Phase 3	2021	2018	2021
Anagliptin	NCT04267601	Korean Observational Study to Evaluate the Efficacy and Safety of Anagliptin Switching From Other DPP4is in type2 DM	Recruiting	No Results Available	Type 2 Diabetes Mellitus	Drug: Anagliptin		2022	2017	2020
BAY81-9783	NCT04665570	A Study to Learn More About How Acarbose and Metformin Work When Taken Together and How Safe They Are in Indian Patients Who Were Recently Diagnosed With Type 2 Diabetes (T2D)	Recruiting	No Results Available	Type 2 Diabetes Mellitus	Drug: BAY81-9783 (Acarbose/Metformin)		2022	2020	2021
DBPR108	NCT04218734	A Study to Evaluate the Efficacy and Safety of DBPR108 and Metformin Hydrochloride Combination Therapy in Patients With Type 2 Diabetes Mellitus	Not yet recruiting	No Results Available	Type 2 Diabetes Mellitus	Drug: DBPR108|Drug: metformin hydrochloride|Drug: placepo	Phase 3	2022	2020	2020
Evogliptin	NCT04706637	A Clinical Trial to Evaluate the Bone Metabolism and the Blood Sugar of Evogliptin and Dapagliflozin	Not yet recruiting	No Results Available	Bone Diseases, Metabolic|Diabetes Mellitus, Type 2	Drug: Evogliptin|Drug: Dapagliflozin	Phase 4	2022	2021	2021
Evogliptin	NCT04170998	Efficacy and Safety of Evogliptin When Added to Ongoing Metformin and Dapagliflozin Combination Therapy in Patients With Type 2 Diabetes Who Have Inadequate Glycemic Control	Recruiting	No Results Available	Type2 Diabetes	Drug: Evogliptin 5mg|Drug: Evogliptin Placebo|Drug: Dapagliflozin 10mg|Drug: Metformin ≥ 1000mg	Phase 3	2022	2020	2020
Evogliptin	NCT04584242	Clinical Trials to Compare the Effects of Pioglitazone and Evogliptin on Hepatic Fibrosis in Patients With Chronic Hepatitis B With Significant Hepatic Fibrosis With Type 2 Diabetes	Recruiting	No Results Available	Chronic Hepatitis B With Significant Hepatic Fibrosis With Type 2 Diabetes	Drug: gluconon tab 15mg|Drug: suganon tab 5mg	Phase 4	2022	2020	2020
Evogliptin	NCT04356742	Efficacy and Safety of Dapagliflozin When Added to Ongoing Metformin and Evogliptin Combination Therapy in Patients With Type 2 Diabetes Who Have Inadequate Glycemic Control	Recruiting	No Results Available	Type 2 Diabetes	Drug: Dapagliflozin 10mg|Drug: Placebo|Drug: Evogliptin 5mg|Drug: Metformin≥1000mg	Phase 3	2022	2020	2020
Gamma-Aminobutyric Acid (GABA), Alprazolam	NCT03635437	Evaluation of Safety and Diabetes Status Upon Oral Treatment With GABA in Patients With Longstanding Type-1 Diabetes	Recruiting	No Results Available	Type 1 Diabetes Mellitus	Drug: Gamma-Aminobutyric Acid (GABA)|Drug: Alprazolam	Phase 1|Phase 2	2022	2018	2020
Gemigliptin	NCT03842267	A Study to Evaluate the Efficacy and Safety of Gemigliptin in Type 2 Diabetes Who Have Inadequate GlycemIc Control With Dapagliflozin and Metformin	Not yet recruiting	No Results Available	Diabetes Mellitus, Type 2	Drug: Gemigliptin 50mg|Drug: Gemigliptin Placebo	Phase 3	2022	2019	2019
Gemigliptin	NCT04255238	A Study to Evaluate the Efficacy and Safety of Dual add-on Therapy With Gemigliptin 50 mg and Dapagliflozin 10 mg Added to Metformin Who Have Inadequate Glycemic Control on Metformin Alone	Not yet recruiting	No Results Available	Diabetes Mellitus, Type 2	Drug: Gemigliptin 50mg|Drug: Dapagliflozin 10mg	Phase 3	2022	2020	2020
GX-G6	NCT03962010	A Phase 2, 12-Week, Double-Blind, Efficacy and Safety of GX-G6 in Patients With Uncontrolled Type 2 Diabetes Mellitus	Not yet recruiting	No Results Available	Type 2 Diabetes Mellitus	Drug: GX-G6|Drug: Control	Phase 2	2022	2019	2019
HSK7653	NCT04556851	HSK7653 Treatment in Patients With Type 2 Diabetes Who Are Not Controlled With Diet and Exercise	Recruiting	No Results Available	Diabetes Mellitus, Type 2	Drug: HSK7653 10 mg Q2W|Drug: HSK7653 25 mg Q2W|Drug: Placebo	Phase 3	2022	2020	2020
Insulin icodec	NCT04582435	A Trial Investigating the Pharmacokinetic and Pharmacodynamic Properties of Insulin Icodec in Subjects With Type 2 Diabetes	Recruiting	No Results Available	Diabetes Mellitus, Type 2	Drug: Insulin Icodec	Phase 1	2022	2020	2020
Insulin icodec	NCT04460885	A Research Study to Compare Two Types of Insulin, a New Insulin, Insulin Icodec and an Available Insulin, Insulin Glargine, in People With Type 2 Diabetes Who Have Not Used Insulin Before	Recruiting	No Results Available	Diabetes Mellitus, Type 2	Drug: Insulin icodec|Drug: Insulin glargine	Phase 3	2022	2020	2021
Lobeglitazone	NCT03627182	Efficacy and Safety of CKD-501 Added to D150 Plus D745 25mg Therapy in Patients With Type 2 Diabetes	Recruiting	No Results Available	Type2 Diabetes	Drug: CKD-501 0.5mg|Drug: Placebo	Phase 3	2022	2018	2018
MEDI0382	NCT04515849	A Study of Cotadutide in Participants Who Have Chronic Kidney Disease With Type 2 Diabetes Mellitus	Recruiting	No Results Available	Type 2 Diabetes Mellitus|Chronic Kidney Diseases	Drug: Cotadutide 100 micrograms|Drug: Cotadutide 300 micrograms|Drug: Cotadutide 600 micrograms|Drug: Semaglutide|Drug: Placebo	Phase 2	2022	2020	2021
PF-06882961	NCT04616027	STUDY OF PF-06882961 IN PARTICIPANTS WITH TYPE 2 DIABETES MELLITUS WITH VARYING DEGREES OF RENAL IMPAIRMENT AND PARTICIPANTS WITHOUT RENAL IMPAIRMENT	Recruiting	No Results Available	Diabetes Mellitus, Type 2|Renal Impairment|Healthy	Drug: PF-06882961 20 mg	Phase 1	2022	2021	2021
Substance P	NCT02820558	Neuropeptide Therapy of Recent Onset Type 1 Diabetes	Recruiting	No Results Available	Diabetes Mellitus, Type 1	Drug: Substance P	Phase 1	2022	2016	2020
Tirzepatide	NCT04184622	A Study of Tirzepatide (LY3298176) in Participants With Obesity or Overweight	Active, not recruiting	No Results Available	Overweight|Obesity	Drug: Tirzepatide|Drug: Placebo	Phase 3	2022	2019	2020
Tirzepatide	NCT04537923	A Study of Tirzepatide (LY3298176) Versus Insulin Lispro (U100) in Participants With Type 2 Diabetes Inadequately Controlled on Insulin Glargine (U100) With or Without Metformin	Recruiting	No Results Available	Type 2 Diabetes	Drug: Tirzepatide|Drug: Insulin Lispro (U100)|Drug: Insulin Glargine (U100)	Phase 3	2022	2020	2021
TRC150094	NCT03254446		Recruiting		Diabetes	TRC150094	Phase 3	2022	2018	2020
Vildagliptin	NCT03958591	Effects of Short-term Intensive De-escalation Therapy on Long-term Regimen Simplification in Patients With Poorly Controlled Type 2 Diabetes	Not yet recruiting	No Results Available	Poorly Controlled Diabetes Mellitus|Intensive-de-escalation Therapy|Long-term Regimen Simplification	Drug: CSII and thereafter combination therapy with wearable devices|Drug: CSII and thereafter combination therapy|Drug: Traditionally upgrading therapy	Phase 4	2022	2019	2019
MSDC-0602	NCT03970031	A Study of MSDC-0602K to Assess Glycemic Control and Cardiovascular Outcomes in Patients With Pre-T2D or T2D and NAFLD/NASH	Not yet recruiting	No Results Available	Type2 Diabetes|NASH - Nonalcoholic Steatohepatitis|Nonalcoholic Steatohepatitis|Non-Alcoholic Fatty Liver Disease	Drug: MSDC-0602K|Drug: Placebo	Phase 3	2023	2021	2021
PB-119	NCT04504396	Safety and Efficacy of PB-119 in Subjects With Type 2 Diabetes and Not Well-controlled by Metformin Monotherapy	Not yet recruiting	No Results Available	Type 2 Diabetes Mellitus (T2DM)	Drug: GLP-1 receptor agonist|Drug: Placebo	Phase 3	2023	2020	2020
PB-119	NCT04504370	Safety and Efficacy of Pegylated Exenatine Injection (PB-119) in Drug-naïve T2DM Subjects	Not yet recruiting	No Results Available	Type 2 Diabetes Mellitus (T2DM)	Drug: GLP-1 receptor agonist|Drug: Placebo	Phase 3	2023	2020	2020
Tirzepatide	NCT04660643	A Study of Tirzepatide (LY3298176) in Participants With Obesity or Overweight for the Maintenance of Weight Loss	Not yet recruiting	No Results Available	Obesity|Overweight	Drug: Tirzepatide|Other: Placebo	Phase 3	2023	2021	2021
Tirzepatide	NCT04657016	A Study of Tirzepatide (LY3298176) In Participants After A Lifestyle Weight Loss Program	Not yet recruiting	No Results Available	Obesity|Overweight	Drug: Tirzepatide|Other: Placebo	Phase 3	2023	2021	2021
Tirzepatide	NCT04657003	A Study of Tirzepatide (LY3298176) in Participants With Type 2 Diabetes Who Have Obesity or Are Overweight	Not yet recruiting	No Results Available	Type 2 Diabetes|Overweight|Obesity	Drug: Tirzepatide|Other: Placebo	Phase 3	2023	2021	2021
DBPR108	NCT04161430	A Study to Evaluate the Efficacy and Safety of DBPR108 100 mg in Type 2 Diabetes Mellitus Patients	Not yet recruiting	No Results Available	Type 2 Diabetes Mellitus	Drug: DBPR108; Placebo matching sitagliptin|Drug: Placebo matching DBPR108; Sitagliptin; DBPR108|Drug: Placebo matching DBPR108; Placebo matching sitagliptin; DBPR108	Phase 3	2024	2020	2019
Evogliptin	NCT04521452	Randomized, Open-label Trial of Inhibitory Effect of Evogliptin on Progression of CAVD	Not yet recruiting	No Results Available	CAVD	Drug: Evogliptin	Phase 4	2024	2020	2020
Tirzepatide	NCT04255433	A Study of Tirzepatide (LY3298176) Compared With Dulaglutide on Major Cardiovascular Events in Participants With Type 2 Diabetes	Recruiting	No Results Available	Type 2 Diabetes Mellitus	Drug: Tirzepatide|Drug: Dulaglutide	Phase 3	2024	2020	2021
Rituximab,Abatacept	NCT03929601	Rituximab and Abatacept for Prevention or Reversal of Type 1 Diabetes	Suspended	No Results Available	Type 1 Diabetes Mellitus	Drug: Rituximab|Drug: Abatacept	Phase 2	2025	2020	2021
